# Supplementary material for: Sex-Linked Loci on the W Chromosome in the Multi-Ocellated Racerunner (Eremias multiocellata) Confirm Genetic Sex-Determination Stability in Lacertid Lizards
Source: MDPI journal article supplement (doi:10.3390/ani13132180), 2023-07-03
Supplement: s1 [file s1]

Table S3 The Information of sex-linked loci of *E. multiocellata*

| Locus   | F<br>count | M<br>count | Criteria for<br>sex-linkag | GBS-tag<br>(T or F) | Seq                                                                                                                                                                      |
|---------|------------|------------|----------------------------|---------------------|--------------------------------------------------------------------------------------------------------------------------------------------------------------------------|
| 482326  | 7          | 0          | (iii)                      |                     | TAAACATCATTCCACTAAAAGTAAACAAAATGGGCAGGGTTCACCAGTCCTTTCACCATAAGCCCTGTGCAATGA<br>TGTCTGCTTGAACAACAGGGTTTTCCCCTTTCCTTCCCCTATGCCCCCCTTACAGGGGTGGGG                           |
| 753445  | 8          | 0          | (iii)                      | T                   | TAAAGACCCTGTAGAAAGCTGTGCTTCTGTACTCTGACACTATCCCATCTGGATTTTTTCCCCTTCCATGAAGAA<br>ATTTCAAATATATTAGCCTCATCTGCCATGAGTGGCTAATTATCTGATATGCTAATGTGAAAATGATT                      |
| 1363913 | 7          | 0          | (iii)                      |                     | TAAGTCCTCTAGGTAAGTGCTTGTGATCCTAGGCAAGTAAGCCACAAGGACTGGAGATAACTTGTGACATTTATGT<br>AAACCATTCTTGACTTTTTTTTTCTTTCTTTTTTTTTTGTAGAAAAGACAGTTACAACAAAGTAGCAAATACCCACTTT<br>TC    |
| 1821010 | 8          | 0          | (iii)                      | T                   | TAACCTTTTTTTTTTGTGTTTTGGGGGGGGGGAGGGAGGCAATCAAATGAAATCCCACAAGCTGTCATTGAGCAAAC<br>ACTGACAACACTATATTATGGTATGTATAGGAAGGCTGGGGAACCTTATGGCCTTTTGGTACTGTTGGATTCCAAT            |
| 2091823 | 7          | 0          | (iii)                      |                     | TAAAGGGAATGCAGTGACGCTACACAGGCAAGAAATGAAACCCCCCTTTTGTGTGTAAGTTGGAATGGTTTG<br>CTTGGAAGTACTTCAGAGAGTTGTTACCCAGTTTCTGAAAGGGGGCGCAGTGAGTGACAGTATGCTGAGTCGG<br>AGGGAGAGCTGTG   |
| 2280877 | 8          | 0          | (iii)                      | T                   | TAACCTCCGAGCCAGTTGGAGTCAGTTGGGAACAACGTCAAGGGGTGACCGTTAGAAATTTGAATTGGAGGGAG<br>GAGTATAAAAAGGGAGAAGTACCAGTGTGAGAGTTAATTAGAGTTAGAGTGAGAGTTCTGGGAGAGAGTGTGTG<br>GGTGGTAATTG  |
| 2496572 | 7          | 0          | (iii)                      |                     | TAATGCAAGGACTTCAACTTGCCCGACAGGACTTCTCTCCCTCTCCCTCTCCCTCTCCCTCTCCTTCTCC<br>CTCTCCCTCTTTCTCTGTAGCCCTGAATCCCAGAAGCCAGTTCTGGCATTTCCTGATGCTCTGGAGCAGATTGAAT<br>GGATGGAGACACAA |
| 2509101 | 8          | 0          | (iii)                      | T                   | TAAAAATTTTATTATTTTTGAAAAGAACGGTAAGGGGTTTTGCAAAGGTTTGGGCCTGATGGCACTCTTCGAATTG<br>TAAGTAACGTTTCCATGTTTTTGTGCGAGACGATCCGTCCAGCGGTGTAGGCGTTCATTTGCCACAAATTT                  |
| 2604112 | 7          | 0          | (iii)                      |                     | TAAACTTAGGAAGAAAAAAAACCACCTAGTGGCCGAACATATATCCCTGAAGCAGATGCTCTGCCTTGTCATC                                                                                                |

|         |    |   |       |   |                                                                                                                                                                                                                                         |
|---------|----|---|-------|---|-----------------------------------------------------------------------------------------------------------------------------------------------------------------------------------------------------------------------------------------|
| 2604336 | 7  | 0 | (iii) |   | GGCGCTTCGTTGCTGTGCGGTGGCTGCCTGCAAGCGGTTCCCTTGGCGGAAAGGGAAAGGCACTCTGTACATGCTC<br>TAATAGCAAAGACAAAAAGTGGTGAGGATAAGGGGGGGGGGGTGAGAGAGAGATGCTTTTGGGCCAACGAGC<br>AACAGGAAGTTTATATGCAAGAGTCAACCAGCTAAACTCAACTGGAATCTAGCCAGCCCATCTGCCTCCCTCACT |
| 2605241 | 8  | 0 | (iii) | T | TAAGATCAGAATACAGTGTAAAATTTGACCCCTTGGTCCACATACTGTATGTTGCCAATGTTCCACCTGCATATTATA<br>ACCTTTTTTCTCTTTTTTGCCATTTTCATCATACATGGTTTTGCTTCTTCTTGAATTCAGATT                                                                                       |
| 2605598 | 7  | 0 | (iii) |   | TAAACCATCTGGTCCTGGTGATTTTCCTGCTTTTGCCTTTTCTATTGCCCATGTACTTCATGTGGGGTTATTTTCTCA<br>TTCAACATAAACTTGTTATCCGTTGGGATTTTCTTCAATTCTCTCTTTAGATATTTATCAAT                                                                                        |
| 2606222 | 7  | 0 | (iii) |   | TAAAAACACTTTGATGACGAGCAGAAAAAGCCCCAACAAACGAGCCCTCTATGTGCACATAGCAATATTTTCAAGG<br>CCTCTGTTTGCTGAGAGTTTCCCAATGGCTGTTTGTGACTCAGTGAAAGCTATTGCTTTGGTGTCGC                                                                                     |
| 2606425 | 7  | 0 | (iii) |   | TAAAAAATACATTTTAATTTATATTTTATGATACAACCTTTTTATAATGGAAGATCAATCTCAGAACTGCCGAAAG<br>CCTCCAGTGAAGATGATCCCAAGGAAGCCAAATAAAACTAAACTTTTGACAGGGTATAAAAAATACATGCTACGTG<br>GAGCACATT                                                               |
| 2608067 | 7  | 0 | (iii) |   | TAAGAAAGTACTAAAGTACACATTCGAGAAAAAGCCAGAGGCCTTCCTACTGGGCATAGTTGGTAAAGAAATAAA<br>TAATAAAGATAGGACATTTTTTAGCTCATTATATATTTTCTCTAGAAGGCCTTCACTACTGGGCAGGTC                                                                                    |
| 2610570 | 10 | 0 | (iii) | T | TAATTATATTGTAAACCTCATCCCAGAATGGTCTTATTTTTATGCACGTCCACCACATGTGCCATACTGTCCCTACATC<br>CAACTTGCACCTCCAACAGACATTACTACATCCTTTATACATTTTTGCCAATTTGTGTGGTACCA                                                                                    |
| 2612740 | 7  | 0 | (iii) |   | TAACAGTTTTTCAAACCTCTGTTGCAAAACACTTTTTCATCTGTCAGGGACTGACACCATGCAAAACACCACCATCCG<br>ATAAATTTACTCCCTCTGCCATCTTCATTATAAATAGCCTCTGTATCTTCCATATTGTGCAACATCT                                                                                   |
| 2613373 | 8  | 0 | (iii) | T | TAAGTACCCACCACCCAAAAGTACAATAGAATTCCTTTGCATGTGTGGAGCCTTAGGCAATTCTGATGATGAGATT<br>TGGGGCTTCCCTTGGCAGACAGTGAGCTCAGCAATGGTCTCCTCAGGGCATTTCCTTGAGTTAGAGG                                                                                     |
| 2613552 | 7  | 0 | (iii) |   | TAAGCACCTCTTACTTGCCTTTTTCCACACCAACCCACAAGCCCATAGATGTTGTAAGCTTTACTCATAGGAGAG<br>AAGGGACACGGGTGGCACTATGGTCTAAACCACTGAGCCTCTTGGGCTTGCCTATCAGAAGGCTGGCG                                                                                     |
| 2614555 | 7  | 0 | (iii) |   | TAATACAAAAGGTCTCAGGAAAGAAGAGGGTGCAATAATTCTAATTCAGCAAGGAATACATCATTATAACCATCGG<br>TTGGGAACCTTTGGCTCCCCGCATATCACTGAACTATAATTCCAATTAGCCCCAGCAAACAAACCAAT                                                                                    |
| 2615254 | 7  | 0 | (iii) |   | TAACAAGAAGAACCAGAGGCAGGGGGTCTCCAAGGACAGGACTGGATGCAGAGGGACACATTTGAGCTCAG<br>GATCTGAAGGAGAGGACAGGGAGGGGGCAGGTGCTGCAACAGCATCACAGCAGAAGCCTGGTCCCTCTTCC                                                                                      |

|         |   |   |       |   |                                                                                                                                                                              |
|---------|---|---|-------|---|------------------------------------------------------------------------------------------------------------------------------------------------------------------------------|
| 2615774 | 7 | 0 | (iii) |   | TAAAGATAAGCAAACCTCCTACACAGAGAGCTCAGTAGCAGAGAACTGGGCAAAGAAAGCTGCATGTTTATTTGAG<br>AAGTGCTGTAGCTCAGTGGTAGAGCATCTGCTTCCCCCAAGTTTGAACCCCAGCAGCTCCAGGTGGAGG                        |
| 2618458 | 7 | 0 | (iii) |   | TAATTCTCTATAAGGCAGTCATATCTGTAAAAATGGGCGCTGCTGTGATCGACCTCACAAAGCTGTTGTGCGGGCA<br>AAACGTTGCCCCAAATTTCCAGGGCATTTTGCACTACGGAGTTTTGCGACAACACTGAGAAAAGCTCTCT                       |
| 2619237 | 8 | 0 | (iii) | T | TAATGTATGCTGCAATAAATCATTTTTGATAAAAGCAAGCTGGCTGCAAAGTGCAGTTCTTGCAGAGACACCCCTCT<br>AATTGACTCATAACAACGGATAACGACAGAACTTATGAGTTTATTTTGGCTCTCTTTCAATGGCTGG                         |
| 2623261 | 7 | 0 | (iii) |   | TAATCTCTGACCTCTCTCTGTTTCTTCTCCCAAGGCCACTCCTCTACCTTTACCAAAGTTCCTTTACAAACTTTGCT<br>GGCTTCTGGGCCAGTTCTGCCAACTGACACCAGCAACAATAGAGATAGAATCACAGGATCTGATT                           |
| 2623385 | 8 | 0 | (iii) | T | TAAGAAAGCAGGAAGGGGAGTGGCTATACTATTGCTCAAACCTGTCCAAGACAGAGCAGTAGTCTGCAGAGGTAG<br>ATTGCCTTGAGCTAGTTAGTGTGGAATGGTGTGCATATCCTTGACCTTAGGAGCTGATGTAATGGAGT                          |
| 2624170 | 7 | 0 | (iii) |   | TAATCATTTCTAAACTGGTTCCATGGGGAGAGCATCTCCCACCAGGTAAACATCTGGATTTTACCCTGCTTCAGGGCT<br>CATATAAAGGACCAAAGTCTGCCCGCTTTCAGTTAGACCAGTTAGCGAAACTACTAGGAAATGGGG                         |
| 2624288 | 7 | 0 | (iii) |   | TAAACACAGCTCAGACGTGACAAGAATGAACGCCTAACCTCAATGCTCTGAAAAAGCCACCAGTCAACAGCGCC<br>TGTCCAACCTCATCAAGTCAACAACACCCATCAACTGCCCCCAATACAACCTCCAACCAGAACACACCCAAC                       |
| 2624394 | 8 | 0 | (iii) | T | TAAGAGGTGGGGGGTAAGTTACAGGGGTGTCCCATATACAGTCATATGGGTGTTGCGATTGGGGTAGTTTGGGCCA<br>TTTGGCACATGGCCGTTTGGTCCCAGGTCTCAGCTGACATGAAGGGCCTTGTTTCAGGGGCAGGCCGTT                        |
| 2625313 | 7 | 0 | (iii) |   | TAAACAGGACTTATGAGTAGAGAGGGCTCAGATTGCACTGCTATCTATCGCTCCATCATAGGAATGAGTATTGCATT<br>GAGAGGAATGAATTTGCAAGTGAGATGTACAGTAATTTATATGTGTGCAAATGTGTTTTGTGCACACTCTCA                    |
| 2627302 | 7 | 0 | (iii) |   | TAAACAGTTCCCAGTCTTTCTCCACTGCTTCTTCACTGAGGTCGCGGATTCTCCCAGTCATCTCCGCGAGTTCCATG<br>TACTCCAGCAACATCATCTCCACTCTTGCTTGTGCGGTAATTCTTGTGTCTTCCAGTATTTGCAA                           |
| 2627643 | 8 | 0 | (iii) | T | TAAGAGTGATATTTTAATTGGAATAATGTGCATTCTCAAAAGTACAATTGACTCTGACGTCCCAATGTAGCAATATAC<br>ACAGAGGAGAGTACAGTATTTTCAGTGCCTCATCTGAAAAAGTTGCTTTAGGATATAACAATTACTGCATTAGCCCT<br>TTATGCCAG |
| 2627651 | 7 | 0 | (iii) |   | TAAGAACGGTCCTCTGGAACGGATTTTGGTTGTGATTAGAGGTTCCACTGTAATGTTACTAGTTGGTAGCATAGCTA<br>TACTTCTCCCCCTTCCACCCACACATCTTCTACTTGCCGCCTTCTCCTCCAGCAACCCACTT                              |
| 2627803 | 9 | 0 | (iii) | T | TAAGATTACACCTCATAAACTACTTTTGACGACAGGAGGAAAATGTGCCAGGAGTGCATCAGCATGTACCGACGT                                                                                                  |

|         |    |   |       |   |                                                                                 |
|---------|----|---|-------|---|---------------------------------------------------------------------------------|
|         |    |   |       |   | AGCAGCTCTGCCTTCGTGCAGTCGCAGTGGCTTGTAATTGCAACTCCCTGCTGTCAAGGGCGCTTGA             |
| 2627893 | 7  | 0 | (iii) |   | TAAAAAATAAATAATAATCCTTCCTGGATCACAATACAGTATCATTACATTTAGCAACATATAGAGAATCCACAAC    |
|         |    |   |       |   | AGAAGCTGTTGGGGAAAAACAATTCTGTATCAGGAAGCTTATACTGTTTGATGCTTTATTATGTTTTATATATT      |
| 2627947 | 7  | 0 | (iii) |   | TAACCCATGTCTGAGGCCCCACTGCTGCGCCCCAGATATGGTCCCGAACGCACGCGCGTAAAAGTGCGCTGTTCG     |
|         |    |   |       |   | TCCGAATGGAGATGGGGAATTTAGCACTCCTGGCTGCGTCACGCTCTTTCCTGCTGCTCACGGTGGACA           |
| 2628103 | 10 | 0 | (iii) | T | TAACCTGCCTGCTTCTTACTTGAAGAGCCTCTTCTTCCACTTCCAACCTGTCTGTCCCCACCTTCTTCTGACT       |
|         |    |   |       |   | GCTCAGACTCTTCCCTTCCCTTTGCCCTGGCTCCTGTTTCACAGGTGGCAACAAATAGCCATAAAAT             |
| 2628230 | 7  | 0 | (iii) |   | TAACCTTCTCTTCTCCAGGCTAAACATCCCCAGCTCCCTAAGCCGTTTCTCACAAGGCATTGTTTCCAGGCCTTTGA   |
|         |    |   |       |   | CCATTTTGGTTGCCCTCCTCTGGACACGCTCCAGCTTGTCCGTATCCTTCTTGAAGTGTGGGGCCCAA            |
| 2628336 | 10 | 0 | (iii) | T | TAATTTCTTGCGTAGCGGAAGCTTTCAGCTTATTTTGCCAAGAGTGATCAAAAATAAAGGCAGCAACACTGTTTCT    |
|         |    |   |       |   | TCTAATCTACAGTGTTTATTAGCAAACTTCAAAAACAACAAACAGTATATATATTACAGATAACTTC             |
| 2629184 | 8  | 0 | (iii) | T | TAAGCCCCCAAAGCGGGAGAATCCCGCAAAAAAATGGGAGGGTTGACAGGCATGCTGGGGAGAGTCCAGAAG        |
|         |    |   |       |   | GCCAGATAGATGTGATGCTCATGGAGCTATACAGAACCCAAATCCTAATAATTAGCAGAAGAGATACATCACATGTC   |
| 2629307 | 10 | 0 | (iii) | T | TAAAAACTTTTGAGCTACTGTGGATGACTGTCCATCACTACCCACAGCTTGTTGTTGCTTCTTAGCTGCCTCCCATC   |
|         |    |   |       |   | ACAGTTCTTCCACATTTCTGTAGTGGCAACCTTGCCCCATCCTAGTTGTCATAGTCCCTAATGATA              |
| 2629531 | 7  | 0 | (iii) |   | TAAGAATTCCTTTGGCATTTTAGTCACTGTGTGTTTTTGAATTTACATTATCTACAGTATGTGTTCTTCTTCCAGCAA  |
|         |    |   |       |   | ATGCCTCTCCAGGACTTGCAGCTTCCCTGGTTGCCTGAAAGAGCAAGTAGGGAGATAITTCATGATGTCT          |
| 2629796 | 7  | 0 | (iii) |   | TAATAATAGATGATCCTCTCTTCTTCCCTCCCCCCCCCTCACTTGCTTTGCATGTGTAACCAAGCTGTGGTCAGATAAT |
|         |    |   |       |   | GCAGCTGGCCCTTTGTTTGACACATTTGGGGAAGAATGACCCCTGGGACAGGATGCAGCAGTGTGCAAAGCT        |
| 2629867 | 7  | 0 | (iii) |   | TAAATCCGTATAGACTTACCCATGTGTACAGCAGGGAGGATAAATACCAAGGAAACAAAGCAACTGGTCAGGAAC     |
|         |    |   |       |   | ATGTTTGGGTGTGGAGATGCACTTTGAAGATATGCCTCGTCTTCTGAAGACCTGTAAAGAGGAGCAGGG           |
| 2630176 | 9  | 0 | (iii) | T | TAAGCTTCTGGGCGGGGAACAGACAATCGGTACTTCGAGGTTCTGATTCTGACTAAGCATGTCTACTTTCTGCTT     |
|         |    |   |       |   | TGCTGTACATAATGCAATAAAGTTAGTTAGTACTACCAGTTGGCTGGTTTATGTCTGCGGACGCTGAT            |
| 2631438 | 7  | 0 | (iii) |   | TAATTATATTATTTAGTTTTGATCTCACATCTCTTTATAATATAGAACTATTACTTATCTGAGGGCCAAATGGCTTCT  |
|         |    |   |       |   | ACTCTGGAAGTTTCTATTGTACATGGGCTTATGTCAGGGGTATCCACTCTTCCCATTATTGTT                 |
| 2632474 | 8  | 0 | (iii) | T | TAACAAATAAGGACTGTGGCAGGAAAGGGGGCCAAAAATAAGGAAAATCCCTGGAAATAAGGGATACTTGACAG      |

|         |    |   |       |   |                                                                                                                                                                                                                               |
|---------|----|---|-------|---|-------------------------------------------------------------------------------------------------------------------------------------------------------------------------------------------------------------------------------|
| 2632491 | 7  | 0 | (iii) |   | CTATGGCGATGGGGTGAGCTCCCGTTGCTCAGTCCCAGCTCCTGTCAACCTAACAGTTCAAAAGCACTTT<br>TAAGTACGGACCTCCAGAACAGATTATGGTTGTAAGTAGACTCACCACCTTTAGCTAATGGGGGCTTCTGCTACCA<br>CCGTGCCGCTAGCACGCGATTCTGTACTCATCTTGAGGCAAAGGTTGTAACCTGGAGCAACTACTTC |
| 2633125 | 7  | 0 | (iii) |   | TAATGTCGGTTCAGAGGTCAGTCTCATGGAAATGGAGATGAAATGAAAGACTATGGCAAGGTGGACAGTGCT<br>CCCGCTTGGGTGGCCGTCCAACCTTCATGACTCCTTGCACTCCCTCCTTAGGGCTCTTTATTTTTACTACT                                                                           |
| 2634103 | 10 | 0 | (iii) | T | TAATAGAGATATATAATAATCAGAAGAAACATACAAGTGGAGTCATGATGCCAGTCTGAGGATTGTGGTCCTGAA<br>CACAATGGCCAGGCTCAACAGCATGTATGAATTCTGATCATAAATCCCACATGATTCCTACAATGCAG                                                                           |
| 2634483 | 7  | 0 | (iii) |   | TAATCCAGTAGTTTCTGCTTTCAAAATAAAGTGCTCTTCAGCTGTAAAAATGACCACCTCCAATGAGAGGATCAAA<br>GATAATGCGTCTGATTCTAGAGAGGGCTTTTCTTAGCCTTGAGGCCCTTCATGGACTGTGCAATGA                                                                            |
| 2634869 | 7  | 0 | (iii) |   | TAACAGGGATGCGGGGGGCCCTGTAGTCTAAACCACTGAGCTTCTTGGGCTTGCCGATTGGAAGGTCAGCGGTTT<br>GAATCTGGGTAAAGCTCCTGTTTCTGTCCCAGCTTCTGCCAACCTAGCAGCTCAAAAGCACACCCGTACA                                                                         |
| 2634927 | 7  | 0 | (iii) |   | TAATAATAGGCCTGTTTCTCATTATTTCCCCCATACACACACACACACACACACACACGCACACACACACGC<br>ACACAGAGAGAGACACAAGTTCTGGTGGACTCGGGTGGACTTGTGGGTATCTTGGCGACGTTTCGACGAGGTCTC<br>ACTCCTCATCTTCAGGCTG                                                |
| 2635844 | 10 | 0 | (iii) | T | TAACAAATAATTCGCCAACAGGCTAAAATCTGACCCACAAACAGCACATAGGTGGCACCAGAGCGTACCAATACA<br>CCCACCCCTCCCACAACACACCAATGATGTTGCTAGTAATCTTAGCAACATTGCTCACAAACCTCATGC                                                                          |
| 2638060 | 8  | 0 | (iii) | T | TAATTTGTGATTTGTGATTGATGGAGTCGGCATGGAGAGAAGAAAGAAAAGACTCTCAGATTCCCCACTTTCCCAA<br>ATGTTGCAGTTCTTTTATCAGGTAGCTTATGTCCAACAAATCATAGTTACCTCACCAAAGACTCTTAT                                                                          |
| 2638191 | 7  | 0 | (iii) |   | TAAAACAGGAGGAGGAGGAGTTTGGACTTGATATCCCCTTTATCACAAACCCTAAGGAGTCTCAAAGCGGCTAAC<br>AATCTCCTCTCCCTTCTCCCTACAACAAACACTCTGTGGGTGAATGAGGCTGAGAGACTTCAGAGA                                                                             |
| 2641161 | 9  | 0 | (iii) | T | TAAAAAATATATAACCACCTTTTAGAATGGGAACTAAAGACGAGTATGTAAAAGAGGCAATGATCAGGTGGGCC<br>CAGGATATGGGCAAAAATATTATGTTAGAAGAGTGGCAGACTTTATGGAATAAAGGACTGAAGTTTACA                                                                           |
| 2641543 | 7  | 0 | (iii) |   | TAATTTGTTGTTTATTGACTTTATTTACTTCCCTTCAAATTTAGGGGTGGCATTCCATCATTTCTCTGGCAATCATGGA<br>TCATCATCATCATCATCATTATAAGTTTGTATACATCAATATAGGGTCGCCAGGAAGAAATAATGATG                                                                       |
| 2642383 | 7  | 0 | (iii) |   | TAAATCCTTCAAGACTAAAAAGCCATTGATCAGTTTTTATAGATATTAGTATCAGTAAATCAATTTGAACACAAAA<br>TCTAAGAATCCAAAATGTAATACAAATTCCTCTAATCCAAATCCTATTGCTGAGCAGACCACCTTCA                                                                           |

|         |    |   |       |   |                                                                                                                                                        |
|---------|----|---|-------|---|--------------------------------------------------------------------------------------------------------------------------------------------------------|
| 2642522 | 7  | 0 | (iii) |   | TAACAGGAACCGCACACACAGCTGGAGATCAAGAAGTAGGACTTGTCTCCTATGGGCAACTGTTGATTTGGGTTT<br>ACAAACTGGCCCTAACTTGGAGACGCCACCAGCCCTGCCGACGAACAAATGACTATGGTGCTAACTGG    |
| 2642652 | 8  | 0 | (iii) | T | TAAGTCACACAGAGCCCTCTGTAACGCCTCTGGGGTCCCATGCTCCTTTTATTTTATTTTATTTTGAAGGAGGAT<br>GTGGGAGGCTGTTTTAGTTTGGTGGTTCATTCTGTCTCTTCCATCCCTCCCTGTAGCGGGTTATGAGCT   |
| 2644282 | 8  | 0 | (iii) | T | TAAGGGATATCGTGTAGGGCAAGAAAGCAATGGCAGCTACAGTAGTTTTATTAGAGGTAAATGTGTAATGGACTGT<br>AGCTGATAGAGGACTTTTTATTTTGTGATGAGAAGCAAATGGTGAGCCACTGTGTGAGACAGAATGG    |
| 2645069 | 10 | 0 | (iii) | T | TAAAGCATCTTCTCCCTCTCTCTTTATTTATAATTGCCATTTGAAACATACAAAAGTGCCTTATATTTAGTCAGAAG<br>ATTGATCTATCTAGATCTGTGCTGACTGGCAGCAGCTTTTCTGGGCTTCAGGCAGCAGACATTCC     |
| 2645688 | 7  | 0 | (iii) |   | TAAATTGTACCACTAAACCATTATCTTGAAGATGATAAACTGTTTCATTCCACAACAGGTCCATAGACACCGCACAA<br>TTTCTGACAGGAAATTAGTTCCCTCAGTCAGACAGAATTTCAAAAGGAAATCCTAGTCTACAAAACAC  |
| 2647001 | 8  | 0 | (iii) | T | TAAAAAATCCTTTGTATTTTTCTGTCTTCCATCTAACCAAACTTTCTAACAGTAGAGCCTCTGAAGGTAGGAGCCC<br>TGGCTTCAATCTGTGGGTAACCTCTGTGGGATCTGGATTGGCTGTTGCATTTGCATGCAGAAGGTCC    |
| 2647600 | 9  | 0 | (iii) | T | TAAAAACCTGGTATTTGGGAAAATTACTTTCTTGATGCATAGGAACTGAGTCAGTTTACAGAAACCTGGTAAAG<br>TACAGGAAATGTCTGGGACAGGTAGGGCTCTGTGAGTGTGTGATGGAGATGGGGGGAGGAGAAGCT       |
| 2647780 | 7  | 0 | (iii) |   | TAACGTCAACCATCGGTTTAGGCTTTTCTTTCTGGTACCGAACAGTTGCAAGGCATGAGCCTAGATTTTGCTTAGG<br>AAAACAAGACAAAACAGAAAATGGTGCTATTTACTTCCAAATGAAAGGCTTTTGCATTACCACATTAC   |
| 2648122 | 7  | 0 | (iii) |   | TAAAAACTTTGATAAACTGTAGCTTTTCAGACATTATTGGCTAGTGAAATAATGGGAGAGGACCAGGATGATGGTT<br>GATTCCTTCCATGACTTTCATTATAATGCAAAACGTTCTAATGTTCCATATCATTATCATATTTCAAT   |
| 2648560 | 9  | 0 | (iii) | T | TAACTTCTGGGTTGTGCGCATACAAAACCCGAAACATTTGACTTCTGACGCATTCACCAAATGAGGTTCCACTGTA<br>TTCCAAATGGAGGGAAATAAACAATGCCAGCTACATGGTTAGCATAGTTTCCCTCCAATTCTGGGGAC   |
| 2648724 | 7  | 0 | (iii) |   | TAACAGATAAAGTTTCCTTTTACAGCACATATATAGTCTTTCACAGAGATTTCCACATTCTGTTGTAGAGAGACTTA<br>TACAACCATGATCCTTTCTTCAGTTAGCTAATTGGCTGACTACAGATCCTGCCATTCCCTTTTGGA    |
| 2650231 | 7  | 0 | (iii) |   | TAAAAAGAAAACGGCATAAGTTGAGCCTCAGATAATCTCCACTCCGCTGCCTGAGCCAGCTCTGGGAACCTGTGAT<br>CCCTTATTTTGGCTGCTGTGATCCCTTATTTTCCAAGCCAAAACCTTGACAGCTATGCTTTTGGCCACTC |
| 2650492 | 7  | 0 | (iii) |   | TAACACAGGGACTGGGCCGCAAAGTGATGACAACCACATGTCATCCTGAGCCACAAGAGCGGGCTTCCCCCAGTA<br>TGCATCTATGGTTTGCTGGGTCTTGGTTTAGCCAGCATTTCTAAACTAATTATGGAACCTTGAGTATGC   |

[illegible]

|         |   |   |       |   |                                                                                                                                                                        |
|---------|---|---|-------|---|------------------------------------------------------------------------------------------------------------------------------------------------------------------------|
|         |   |   |       |   | GCTTCTTCAGGTTACAT                                                                                                                                                      |
| 2660240 | 7 | 0 | (iii) |   | TAATGGAAGAAATACCTGTAAGCCTCTGTAGATGCTGGATGTAGATGTTTATGTAGATGTGGAAGAACTGGGCAAAAC<br>GTAGCAGCTTCTGTTTCATTTTCCCCTTGTTTTTTCATATACCATTATGATACTTGCTGTGTGGCACACCTGGA           |
| 2660482 | 7 | 0 | (iii) |   | TAAAGGATTTTGGGGGGGGGAGGAGTTGGGAGAAATTAGCTGGAGAGGGGGAGAAAGGGGTTCAGATATGGA<br>GGGGGGGGGTTCCCTTTTACTCTCCCTGGATCTACAAAGGGGCAGCTGGGAGGGGAAGGAGGTTTCTTGGGGGA<br>GGG          |
| 2665400 | 7 | 0 | (iii) |   | TAACCCGAAGTACCACTGTATTGGCAAACCCTGGAAAAGCAACAACATCCTACAGTTGCATCACAAGGTAACAAA<br>GTTGTAAAGAGCTGAGTTTCCTGCTCTGTTGTTCTTGCTCTGACTTACACCTTTCTAGGACAAAAGAAAGTT                |
| 2666913 | 8 | 0 | (iii) | T | TAATTCTCTCAAATCCATTTCTGGACCTGCCATCGATCTGCGGCCAGAATTGAGGATGCACGCATGCAAACATGAC<br>AATTGTGTTCTGCAGCTTCACATCTGCATCGTTCTCAACTGTTTCAACACAACAGGCTCTCGGTTGTG                   |
| 2668377 | 7 | 0 | (iii) |   | TAAGTCCTCCTTGTTCAAGGTATTCTGATGTGACCCGAAAAATTCTTCTCCTGTTGTTTTTCTGGCAATGCCTTGC<br>AAAAAAAAAGAAGTTTTCTCTAATTGCATCACCATCCACAAAACGCACATTGGCCAAGAGTTGAGCATGTCCACTG<br>ATATCA |
| 2669513 | 7 | 0 | (iii) |   | TAAGCAATCATATATGTCCGACAGTCAACTGATTGCGGCAAGTAGAGGGAGGAAGCATGTTCAAGAAACCAAAAAG<br>AATGACTACATAGAAAAAGGAAAAACCTGTCTTTAGAGAATACTTTAGCTTATTGATGCGGCACGTGCT                  |
| 2675858 | 7 | 0 | (iii) |   | TAACCACATCAAAATTACATAAATTTATTTGAGCAGAAACAAATGCTTGGATAAAACAAAATGTTTTCAGTTGCTTG<br>CGAAAGCATCATCCTCAGGATATTTTCTGTGTCTCTTGGGGCAGACTGCTCCAAATTGCAGACTATACCATTGAG           |
| 2676964 | 7 | 0 | (iii) |   | TAAAGCGTGCGTACACTGCAGGTAGCTGAGGGATCGTTGTAGCGCTGAGGTGGGGTAACTGTACTGACTGCTTGC<br>GCTCGTGGCTTCCTTGCAAACAATGTTCTGTGCAGAACTTATAGTCAAATCTGATAGATTATCTGCCC                    |
| 2686458 | 8 | 0 | (iii) | T | TAATACCCCTCCCTTCACCCAGAGGGAAGGTTACATTGTGTAAAAACACAAGAAGAAACACAATAAAGTTACAGTA<br>GACTGTAATAAAAAGCATCAGCAAATCAGTATGAAATAATGGAGGGAGTAGATCATTTTCATATCAACCCT                |
| 2691342 | 7 | 0 | (iii) |   | TAAGCCATTTCTATAAATTGTGATACCGCCATTTTTTTGTCTAAGGATTTTCATGGCATCCAAAATGGGAAGACCACT<br>GTTTTTGGGAAGGACTTGCCATCCTACATTCTCTAGAATTGACCTCTTATGAATTTTGTGGGTTTGA                  |
| 2692930 | 8 | 0 | (iii) | T | TAAACCCTCCATTTGGGAATCCCTTGCAGATAACTGAAGTAGCTGAAGACAGTCAGGTCTTTTCTCCACACCACTG<br>ACCAGAGGAGGAATGACCCCTGGGGGGAACACCAGAATGAAGAAATGCCATTATGAACCTGCAGGAGC                   |
| 2693823 | 9 | 0 | (iii) | T | TAACAAAATGACCATTGAATACAAATATGTCCTGATGCCAAACCGCTTGTGGCACTGCAGTGTCTATCTACAGGAC                                                                                           |



|         |   |   |       |   |                                                                                                                                                                                                                                 |
|---------|---|---|-------|---|---------------------------------------------------------------------------------------------------------------------------------------------------------------------------------------------------------------------------------|
| 2695650 | 8 | 0 | (iii) | T | CAC TTTT TAGCTGAAGGGTATGGCACAAAGAAAACCAGCAAGCATGCTGCAGCAGACGAGGCACTGAA<br>TAAGCGACTTTGCTAGCATAGATTACAGCTGGGACCCTGAGTTCCAGTGATGAACCTGTGAGATTCAAAGCTGCAA<br>ATTCTCTGGAAATCAAGCTGGAGAACTCCCAGATTGCAAATGTGATGCATGGGAGGAGGGAATGAAATC |
| 2695803 | 7 | 0 | (iii) |   | TAATGTTACATAAAATGCAGGTGGTGTGTGGTCTAAACAACCTGAGCCTCTTGGGTTTGCTGATCAGAAGGTTGG<br>CGGTTTCAATCCCTGCGATGGGGCAAGGTCCCGTTGCACAGTCCCAGCTCCTGTCAACCTAACAGTTC                                                                             |
| 2697440 | 7 | 0 | (iii) |   | TAACTTGGAGAGGCGTGGTCTGCGTCTGAGCGTCTGACGATGTTCTGCCTACGCTCCCCTGTGACGGGACCTG<br>CACCTCCCCCTCTCCTGAACTGGAAGTGGACATTGGCTGTGAAATCGGTTCTACTGTCTGGGATGCTG                                                                               |
| 2700196 | 7 | 0 | (iii) |   | TAAGGGAGATCTCGACAGTAGATCGGACTGAAATTCAAAGAACAGCAACTTGGAAAGCTATCCTCACTCTCCCAG<br>GCTTCCATCAGATGATCCCAGGCCAGCCACCAAGCTCTCTGTGTGGTCTCATGCAAGTCACTCTCCCTC                                                                            |
| 2701758 | 7 | 0 | (iii) |   | TAACCTCCTTTTACTACTATTATGAAAAATAAAGCAGTAGCATCTACTATATGGAATCTACTTTGGTCCCCAGCTCT<br>TGATCTGAAGAAGTGTGTATGGGATCAGTTTGAGAATAGTAGAGAGATAAAATGGAGGAAAGAGA                                                                              |
| 2703351 | 7 | 0 | (iii) |   | TAATTCTATGACATATTGTTGAAGGTTTTTACCGTGTCCATGAACATCAGGATTGCCTATTTATCTGGTCTCATTTCT<br>AAGTACTCCAGTATGTCAATTACCATTCTTGTGCTACTGTGCATTTGTATCCCTGGCAAGAAGCC                                                                             |
| 2703674 | 7 | 0 | (iii) |   | TAACCTGAGGCACCACTTTAGCTAATGGGGCTCCTGCTTCCGCCACGCCGCTGGCGCACGATTCTGTACTCATC<br>TTGGGGCAAAGTTTGCAACTAGGAGCAACTACTTCCAGGTTAGCAGAGTTTGTAAACCAGAAGTGTCTG                                                                             |
| 2706132 | 8 | 0 | (iii) | T | TAAGTCTCCTTCACCAGTATTGCCTTGTTGAAGCAGTTACCACAATATTATTTGATACCAGTATTCAATGATATGGC<br>AGTTTATTACACAACCTACTAGCTGGGAACTCCTTATTGTGTTCAGTACAGTCATACCTTAGTTG                                                                              |
| 2709754 | 9 | 0 | (iii) | T | TAAAAGATTACAGCAGGACAAAAGGGCAGGGGAGGTCTCACATAATGCTGGACCAGCCTAAATTCAACAGCGA<br>CATGCCAATATGGACTTTGCCAGGACTGTATGCCCTTGAATGAGCAACAGGGTCACCTGCCACCAATCCC                                                                             |
| 2710219 | 7 | 0 | (iii) |   | TAAAATGCCCCAATCCAAATTCACAGCCTTCTGGGTTCTCAGCCAGATGAATGACCAGCAGGTGCCCAGAAGCAG<br>TGAATATATTTGGAAAGGACAGAACTAAAGTCACTACTGCGTCCCAGTCTGTGAATCCAGGAAACATACA                                                                           |
| 2710492 | 7 | 0 | (iii) |   | TAAGTCCATATATCATTGAAAGTGAAAAGACTATAAGAGGAAGGTCCGACCTTATATGCCTCTTCTTTGAGGCTGCA<br>TGAAGATTTGCAGTGTTAGAGCAGAGATTTTGAGATGGTAAGAAGGAGGCATTCCAATAATGTGCT                                                                             |
| 2711760 | 7 | 0 | (iii) |   | TAAGGCTACGCAGTAGTTATTCCTGTGCAACTCTCTGGACAGCAACATCCTAACGCTTAGGGTAAAGAAAGACTG<br>CATCCACAGGTTATGGGCCAGATTCTGAGGCTTCCAAGTTGTGGTGTCCAGAGTTGGTGAGGTCGTG                                                                              |
| 2717683 | 7 | 0 | (iii) |   | TAAGGCTGTCCCGCATTGCAGTAGTCCAAGCGGGAGATGACCAGAGCTTGCACCACTCTGGTGAGACAGTACACA                                                                                                                                                     |

|         |   |   |       |   |                                                                                                                                                                                                                              |
|---------|---|---|-------|---|------------------------------------------------------------------------------------------------------------------------------------------------------------------------------------------------------------------------------|
| 2718013 | 7 | 0 | (iii) |   | GGCAAATAGGATCTCATCCAGTGTAACCAAATGAAGCTGGGAGAGAGCCACCCACCTTCAATGCAGACAG<br>TAATAGGATGTTCCCTATGCGGTTCTGCTTCTGCCTAGCAGTTAGGTCAGCACTGTCTTTTCTGTTGTTACTGAAA<br>GAAGAAAAAGAGGATCCACAGTGTGGGAAAGATTATCAAGACCAAAGAGGAGGTGGATCTTCCCAC |
| 2718166 | 7 | 0 | (iii) |   | TAAGTGCTTTACTAATAACACTGTGCATTACAGAATGAGTCTGACAACCACATTTCCAGCTGTGTTTCCCTTGCCGTA<br>AACCCATGCACCACCTCACCAGTAGCAAGCACCCCTCTCTTTTCACCCACAGCCCTGCCTGTGGTGGTTTTTTCAT<br>ACCCC                                                      |
| 2719220 | 7 | 0 | (iii) |   | TAAATACCACTTTCTTGGCTCATTACATACGCTTTTATATCTTTTATATTTTTTCGAACAACTGCACACACCACCCAG<br>GTGTTATCTTGTTTACCAGACAGGGTTGCTCTTTAGACTGTATCAAGTTCAGTCAAAGGGGAAAGA                                                                         |
| 2722314 | 7 | 0 | (iii) |   | TAAAAGTCTCAAACTTCAGCTAGCTTTTCTCAAAGCTTTAGCTCTCCAAAACAGCCACTTTGCCTCCCAGGACC<br>CAATCCTTACTACTCTTAGGATGTGTCCGAGGCTCTCTCCGTTTTCTTCACTGGCGCCCTTCCACTGTCTGATT                                                                     |
| 2748810 | 7 | 0 | (iii) |   | TAAGCAATGGAGACATTTCTAATTGGAGCCAAGCATAGAGTGCAGGTGTGCACGGATCACAAGAATCTGGAGTA<br>CTGGAGGACGGCTAAGATACTGAACAAGAGGCAGATACGATGGGCAGAGTTCTTTGCGGACTTCAATTT                                                                          |
| 2749663 | 7 | 0 | (iii) |   | TAATAAAAATCGAACTCCAAAACCTTAGGCTGAAGTGAACGCGAAAGCCTCTGACTAAGTTCCTTCAGAAAAATCA<br>TGAAAACGTTCCCTTACCATTCAAAGAGTGCCAACGTGCCCAAAGCTTTCAAACCTCCTTACCGTTTTTTATAATAT<br>ATAA                                                        |
| 2751846 | 8 | 0 | (iii) | T | TAAAGACTGCTATATCTGAAGAAGCAGACTCCTCTACAAATGCTTAGACCACAATAAACATGTTAGTCTTTAGGGC<br>AGGGGAAGCCAGCCTGATGCCTTCCAGAGGCTGTTGGACTACAACGCCCATTGTCTCAGCTGGCATG                                                                          |
| 2752760 | 7 | 0 | (iii) |   | TAAATTGAAATGGTAAATCCGTGGGAATCGTAGGAATGCGTGGAATGAGGACATCTTCACCTTTCTTGTTGGAG<br>ACTGATTTGGTGTCTTCTGGTTGAGTTCTTTCCGCCACTGAGAGCCTTTTGCATTGAATCTGTTGAGAA                                                                          |
| 2753130 | 7 | 0 | (iii) |   | TAAGTTGGCATGTTTTCTCTAACCATAGTAAAGAATAGCCACAGTTCTGATGATCCAGCAAACCTGTGAATAATATAA<br>AACACAAACAAATTTCTGAATTCCAGCTTGTAACTACTGTATACCTGCAAAAAGGAGGGAGCAATCCAAGAATTG                                                                |
| 2753926 | 7 | 0 | (iii) |   | TAAGAATCTGATGCTCTGCTGACTGTGCATATCCCAGTTATCTTGGGAGAAAATGGTTAGTGTAGTTACAAAAAGT<br>TTCCCCCATCACCACAACCTTGCTTTATGGAGGCTCAGTATTTTACCCTGTGAGAACTTTGTCTCTG                                                                          |
| 2758178 | 7 | 0 | (iii) |   | TAAAGGGGTCAGCAATCTGCTGTGCCACCTCCATGTTCCCCCTTCCCGCCCTGCGCTCCCCCTCCCAGCCGCGTT<br>CAGCTGCATTGATGTGGGGCATGGCGGTGAGAAACACCATCAACCTCCTCCCTTCCCCCATCCTTCT                                                                           |
| 2758804 | 7 | 0 | (iii) |   | TAAGATGATGTGATTTATAGCTCTTTGAGAGCTAGAAAAAAATTGCATTGAGACAAAGCCACAGGCTGAGTTGCG                                                                                                                                                  |

|         |   |   |       |   |                                                                                                                                                                  |
|---------|---|---|-------|---|------------------------------------------------------------------------------------------------------------------------------------------------------------------|
|         |   |   |       |   | ATCCTATTGGGAGCATGTCTTTGCTTATTCCAAGCAAACATATTGGATTGTGCTGCAAATACATGC                                                                                               |
| 2761861 | 7 | 0 | (iii) |   | TAATGACTGCTGTAATTACAAGTCATCTTTTCTCTTTGGGTGGTCGCTGCTGGGACTTGAACCACTGTCCCCCTCCA<br>CATCTGCAAAGAAGGGATCTACTCTGTGAGTAAGGGTGAAGAAGCTTGTTTTGAGTTCTTCTAGTTAGAG          |
| 2764875 | 7 | 0 | (iii) |   | TAACTAGGCAAGAAAAATGGATTCTGGACCAAAGCTCACAATCTGAAAGAGATTATTAGAGAAAAATGAAAA<br>TTATTGTCTAAAATGTATAAGCTAACATAAGAACATCCCTGCTGAAACAGGCCACAGCCCATCCAGTCCAG              |
| 2766984 | 7 | 0 | (iii) |   | TAACATTGAGTCCGTAAGTGATTGTGGAGGCTAATTCTGGATCCAAACATCCTTCCACAGTGGGGACATAGGTTTC<br>TGGGTGAGAATTGATCATGAGGAGGGTTTGCCAAGCATGCCTTCCTCTATCTCAATTTCTCCCTTTCG             |
| 2767727 | 7 | 0 | (iii) |   | TAAGCAGCTTGTATGCAAATACTGTAGGAACAAGATAAAACCAAGACAAGCCTCAAGGGATGACTAAAGGTGCTG<br>CTCTTTCAAGTAATAGATTTTGCCCAGAATTGAGAGATACACTTTAGGAATGCCCAAGAGTAATTGTAA             |
| 2770340 | 7 | 0 | (iii) |   | TAATGACGTAAGTTGAGGTACCACTGTATCTTGAATACCCATGGGTAATGGTGAAGAGAAACCAAGGCAAAGATGC<br>ACAACCATACAGCTCACACAGATGCCTTCAGATACAAGGAAGTGGATGTTCTTTGTTCTTTTGGCCCT             |
| 2775401 | 7 | 0 | (iii) |   | TAAGGGCCAGACTTGAGTGAGCTCAGCTGGCCATAGCCCCACATCTGTATGGAGTTTGGATTTACACCAAAAATTGC<br>AGCAGCATAATTTACTCTGGTTGGCTTCCTGTAGTTTGGATTGTTTCAGATGTTGCTGGACTACAGTAC           |
| 2781689 | 7 | 0 | (iii) |   | TAAAGTCTGAAACTGCGTACCATGTGAATTTACTTGGTTTTGTCAATTTTCCCTCCATGTCAATGGCCAAGCAGGG<br>CAATTGTGATACCATAAECTACCATGTGATCAAGATGGTGTAAAGTCGTAAGCAGCTTGCAAATGTGT             |
| 2785097 | 9 | 0 | (iii) | T | TAAGTCATTGTCCTCACAAAATGGAAGCATGGTGAGGACTAAATGCAAATCAAACCTCAAGAAGAACGGGCATAGG<br>CGAATGAACAAAGGAGACAAAGGATGGCTCAAATGCATGCCAAAGAAGCAGCAGACAAACGCACAGCCA            |
| 2794446 | 8 | 0 | (iii) | T | TAAAATGCTAAAAAGCAAAGGTCTATACAATGTTTGGGGCGAAAAAAACCCAGGTGACACTAGCCACACATTCCA<br>GTCTGGACGTCATGGCACAATGTCCAGACTAGACAGCATTCTTCTCACTCAGGGTCTGATGCCCTTGGTGGAATCA<br>A |
| 2803012 | 7 | 0 | (iii) |   | TAATGGGAAAGACTTACTAGATGAGGGAAGGAAAGTGGAGGGGAGGGAGTTTACTAGGGATCATATGTAGATATTT<br>GAAGATATATACAAGTTTGGTGAATTCAGGTCTTTTCCCGTGAAGTTTGGGGGTATCTTGGTGACG               |
| 2807588 | 7 | 0 | (iii) |   | TAATGTTCTCGAAGGTCTTCTTTCCCTGCTTTTCCCTCGTATCTTCTTTCTTCACAGTAGTTGTTAGTAAAGGTGTC<br>TTGGAGTACAATAGTGTGTGTCATGTCTCTTTTATGAGTTGTTTCATTTTACAGTTCAGTTTGT                |
| 2809142 | 8 | 0 | (iii) | T | TAAGCGTCTTTGCGGTGCTGGATTTGAGCATGAGGTTTATAAGCACTGTTGCTAGTGTTATTAGCAACAGCATTGTT<br>GTGTTTGGGTAGGGTGGGTGTCTTGGTACGCTCTGGTGCCACCAATGTGCTATTTGTATGTCAGGAT             |

|         |   |   |       |   |                                                                                                                                                                     |
|---------|---|---|-------|---|---------------------------------------------------------------------------------------------------------------------------------------------------------------------|
| 2811108 | 8 | 0 | (iii) | T | TAACCTAGTGTGAATGGAAGCAATTCCTCTGATGGCCTTGGACCATCATTTGATGAACTACCATCAACTGTTGGAGC<br>TGCTCTCATCAGAAGGATCACTGTACATATGTTCAATTAGTCCTAGATGTCTCATAACGTGTGATGCT               |
| 2811212 | 8 | 0 | (iii) | T | TAAACTTTTTATGTCCAACATCCTTTGCCCAATCTATCATAACAGATTTTACTTGTTTCATCTTTCATATGCCACTCCAG<br>CAATAAATTATACATTTTGAAAATATTCTTAGTCTTGGAACGCTTGGCAACTCTCACCTCGCTGGGCT            |
| 2812086 | 7 | 0 | (iii) |   | TAAGTGGAGGATGAAACAGAGAAACCACCTCACTGGACTTTTCTTGGCTTACTGCCACCCATAGCTACTCTCTCTG<br>GGAAGGAAGTGAGCTATGATTTTGCAATCGTATCTGTGCAGTAGGGAGGCAGAAGAGTGGAGGAAGAA                |
| 2818973 | 7 | 0 | (iii) |   | TAAGCCTCTAGGCAACCTGAGCTACCGTGTAGATACTGATATCATATGAGGACGTCATGCCTCTTATTGCAAGAATG<br>GGGAACCTGTGGCCTTCCAACCTGCCACTGAACTGCAACTGCCAGCACTCTTGACCATTGGAAATCAAGCTCCAAC<br>AA |
| 2835896 | 7 | 0 | (iii) |   | TAAGGCTGTCTTTTTGTGGTTTTTGGGATAGAGACTATTTTGGAGTGGGTCCAGGTTTTGGGGATGGGTCTCTGTAAG<br>GGAGTCAGGGGAAGAGAAGGCAGAGGGCAAAAGCGGGAAAGAGGGAGAGAGGGAAGTGCCAGGGCTAT              |
| 2836578 | 7 | 0 | (iii) |   | TAACACAGCAAGCACCAACAGCATTCCCCAACCCACACCTCCACATAGATCCCCATGCAACACCAAGTCTGGACG<br>ACACTAAATCACACTACCCATCAACCCACAATTCACCCCTACCACTGACCACTTCAGAACCAAGCAAAC                |
| 2843274 | 7 | 0 | (iii) |   | TAAGGGGTGTGGGGAGAGTTACAGGGGTGTCTATATGTGGTCATATAGGTGTTTCAATTTGGGGTAATTTGGGCCAT<br>TTGGTGCATGTCCGTTTCGGCCCTAGGTCTCAGCTGACATGGAAGGCCTTGTTTCGGGGACAGGCCGTT              |
| 2847708 | 8 | 0 | (iii) | T | TAAACAGCATGGGGGATAAAATCAAACCCTGAGGAACCCACATTGAAGGCTTCACAGGGCTTCACAGCTCTCCC<br>CAATCATCACCTCTTGAAATGACCATCCAAGTAGGACTGGAACAACCACAAAGCTGGGCTCCCTATCC                  |
| 2869181 | 7 | 0 | (iii) |   | TAAGTCGTCTGGTAAATTTATACCTATGCTACTCTGCCACAGCGCTTAGCTTTGGAAGACAGATCAACCTGAC<br>TGCACAAATCATTGCATGGTCACACCATCAAATCTGCTACTTGGGGTTTGGAGAGAGCAAAATCCAA                    |
| 2871145 | 7 | 0 | (iii) |   | TAATGGAGGAGAGAGCTATTGGCTTCTGAATCCCAGTTGCTGCAAACCTCAGGAGGGGGGGAGTTGTGTTTTGG<br>GGTTTCCCATTGGGGCATCTGGTTGTCCCTTGTAAGAACAGATGCTGGCCTAGATGGGCTTCTCTTGGGT                |
| 2872615 | 7 | 0 | (iii) |   | TAACAACTCCTCCAGTTCATAGAAGAGCTGGCAATCCAGTTGCCAACCCTTTTCTGGTAGTAAGAGATGACACAA<br>TTTGGTCAATTCTCTCTTCCCACACCTGAGCCACCTCCTACATATGTCCAGAGGGCCTTCCAACAATC                 |
| 2873202 | 7 | 0 | (iii) |   | TAAATCTCCCAATAATATAATTTTATAGTCCAAATAATCAGCCAAAGTCTTATCCAAGTCTTATAGAATTCAGCTTTT<br>CCATCATTTGGTGCATAGATACCAGCCATCAAAATCTTTTCGCCTTGTTGGACCGTTTCCACCAG                 |
| 2874027 | 7 | 0 | (iii) |   | TAAAAAACAAACACATGAGGCGTGCGTCCCCAGACCCTATCTACTTCCAGAATTGTAAACAATAAAATGAACTGT                                                                                         |

|         |   |   |       |   |                                                                                                                                                                                                                                    |
|---------|---|---|-------|---|------------------------------------------------------------------------------------------------------------------------------------------------------------------------------------------------------------------------------------|
| 2875107 | 7 | 0 | (iii) |   | TCAAGACACTGAAATGCAGAATATAAGCACAGTAACCTTTCACAGTACGTATGGCCAGCTACTGCTGTA<br>TAAATTATATTTAGAGTCCTTTTCTTTTCTTTGAGCCATGTTTTGATCTTTTTCTCTCTCTGAAGCAGCCAAGGCCAGTTC<br>CAAACCACAAATATTTTCTTACATAAAACATCCAGTGTTCCACTATTTCAAGGTCACCTCAGAGATAC |
| 2876301 | 8 | 0 | (iii) | T | TAAGCCCTGTATACCTGATGGAGTGTGTCTTCCCCCATCATTAGCCTGGACACTGAGGTCCAGCGCTGTCAGGGG<br>TTCACCCAGAGTAGCAGAGTGATCAGTGAGGCTGAGCAGGAGGACAAGATAGAGGAAGAGGAGTGGG                                                                                 |
| 2876954 | 8 | 0 | (iii) |   | TAAGAAATGGGAGTGCCTGACCACCTCATCTGTCTTCTGAGAAATCTCTATGCAGGACAAGAAGCTTCAGTTAGA<br>ACTGGATATGGAACCACTGACTTCTTCAAAATTGGGAAGGGAGTATGACAAGGCTATATATTGTCTCCCTTTTTTTT<br>TTTTT                                                              |
| 2877631 | 7 | 0 | (iii) |   | TAAACATATGGAAGTGAAGAGAGAATTAGACTTCTTAGAAATCAACAAAACAATGATAAACATTCCATACCTA<br>AAACAGCACTTCTACAAATATTTGGGGGGGGGGGACGGCACGACTCCAGGCTATTAGCAAATAGGTGTAGGAAA                                                                            |
| 2883610 | 7 | 0 | (iii) |   | TAAGATCAAGTTCCTATAAAGGCAGGCATTTGAGGGAGGGAGCCTCATCACAGACCCAGGGCTAGGGTGCTGT<br>GAGTGGGTTTGTGTGTCCTCGCTACCCATTTGAGGGGCTCCTGGGAGTAGATTGGGGACATGCTGATT                                                                                  |
| 2899017 | 7 | 0 | (iii) |   | TAAGCAGAGGTTGGATAGCCATCTCTCATGGATGCTTTCGTTGAGATTCTGCCTTGTAGGAGGGTTGGACGCGAT<br>GACTCTTTGGGTTCTGCCCAGCGCTACAGTTCTGTGATTCTTCCCTGCTTCTGATTCTAGCCTAATCT                                                                                |
| 2946768 | 7 | 0 | (iii) |   | TAATCTGAACTCTTCGGTGCCGTACCGCACCCAGAGCTCAGAAATTGCTCACTGTAATGAAATTCCTTGTGCGAAA<br>ATGCGTCTAGAACAAATGGGAGTGTCAAACACTGATGGAAACTACCTGCGTTTAGTATGTGCCTTACTG                                                                              |
| 2977889 | 7 | 0 | (iii) |   | TAAAATATAAAGGCACCTTTTTTTACTTTTAGATAACACCATGGCAAAAAAAAAAACCAGTAGCTCATTATTGAAT<br>TGAATTGAATTGATTATTTGTACCCTGCCCATCTGGCTAACAGTCTGGTCCTAGTGGAAGCAAATGTTATTCT                                                                          |
| 2981102 | 7 | 0 | (iii) |   | TAAATATGCAGATGATATAACTGGTGGGTCAGATTCAGGAAGAAAATGGGGGGCTGTACTGAGAGGAAGGAAGAG<br>TCTAGTGAATTGCTGCAGGAGAAATAATCTTGGGCTGAATGTGGAAATACCAGAGAGATCGTTGTGCGAT                                                                              |
| 3000569 | 7 | 0 | (iii) |   | TAAACTCCCATGATCCCTAGGTAACAGGACCAGCAGTGAGGGATGATGGGGAGTTGTAGGTCAAAATATCTGGAG<br>GGCCAAAGTTTGCCTATGCCTGCCTTTGAATGACTGCAAAATAGCTGCAAGAAGACTTTGGTGGCAGCA                                                                               |
| 3017866 | 7 | 0 | (iii) |   | TAAGTGTTTGCTGGCAGGGAAAAGGAAAAACACTTGGTGACCCAACCTGCCAGCGAAACAATTTTTTCCGCCA<br>CACCTCCTGGCCTGAAAACACAGCCTTCCACTATCCTCTGACCCATAGGACAAATCACCTATATGCC                                                                                   |
| 3028454 | 7 | 0 | (iii) |   | TAAATTCACCTGCAAGCAACTGCCTTAGGGAGGAACTAAACATGGACAATGTGGGACTGCTTTTGAAAACCAACC<br>TTCAATACCATGTCATATTTTCCCCCATCTTGGCAGTGGCAGCTGATCGTCATGTTGAGCAGAAGTGGA                                                                               |

|         |   |   |       |                                                                                                                                                            |
|---------|---|---|-------|------------------------------------------------------------------------------------------------------------------------------------------------------------|
| 3057829 | 7 | 0 | (iii) | TAAAGCACATACACCAAAGAACCATGTGAACTCTATTTTGTATGGGTGCTGGGAGTGGGAACAATACATGCAATA<br>TATTGGAGTGGTAAACTACAGTTCCCAGGATTCGGAAGGAACAGTGTGCGTAGGCAGCTCCGCATTTCC       |
| 3122315 | 7 | 0 | (iii) | TAAACTACAAGGCCTGCTCATTACTCAATACGAAATACTGTATACTGTATATTGCTCAAGGGTACGCAATAATTGTGC<br>CTAACATAAAAGGCAGTTGTAAACTTGTGACTATTGTAAATTGTAAATACAGTGGAAGCTCAACAA       |
| 3167280 | 7 | 0 | (iii) | TAAGTTGAGCTTTACGGCCTCATGTTGAGCAAGGTGCCCAGGGCTGTTGGATGAATTGGCTGCTAGTTGAAGCAG<br>CCTCAAGTTGAATAGAATAGAATAAGATAAAATTTATTATTTGTACCCCGCCCATCTGGCTGGGTTTCC       |
| 3213775 | 7 | 0 | (iii) | TAATTTGTAAACCAAATAATACAGGTTCTACTACAGTCAAAGGTAGAACACAGGAAAGGCAAGCTATGTGGAGC<br>AAAACCAACAAAATATGGGCTAATCATCATGATGGCAGAAATTGCACCCTACACTTATAGGTTGAACAT        |
| 3306623 | 7 | 0 | (iii) | TAAATGGCAATTCTCAGAATGCTTGAGGCAGCTAACAAAGCAATCACAAGTAAGCCTTCAAAATCCCAATACTAAA<br>AACATCTTCACAATAAAAAATAAAAAATAAAAAAGCTGAGCAGTTGCTTACCTGGAAGAGCTGACTTGAATACA |
| 3326811 | 7 | 0 | (iii) | TAATCATCTGAGGGTCAATGGCGCTGTGGTCTAAACCACTGAGCCTCTTCGACTTGCCAATCAGAAGGTCGGCGGT<br>TTGAATCCCTGTGACGGGGTGAGCTCCCGTTGCTCGGTCCCAGCTCCTGCCCACCTAGCAGTTCAAAA       |
| 3506757 | 7 | 0 | (iii) | TAAGTGACGTTTCGGTCAGCCGTAGAGGAGGGCTGTGTTTCTGTTGTTTGAAGTAGAAAGCAAAGCCAGTCTCCTC<br>AAAGTCTGGGGAGTAATCCTTGTGTAAATTGCCTCTACTCTGTAATGCAAAGTAAATCCAGGACCACC       |

Note: Col, the nucleotide site within the catalog locus, reported using a zero-based offset (first nucleotide is enumerated as 0); F count / M count, we split samples into male and female: males were assigned to M count, females were assigned to F count; Criteria for sex-linkage, the approaches screened for sex-linked loci confirmed, validation of sex-linked markers, 'F' and 'M' indicate true and false, respectively.
