# Supplementary material for: Sex-Linked Loci on the W Chromosome in the Multi-Ocellated Racerunner (Eremias multiocellata) Confirm Genetic Sex-Determination Stability in Lacertid Lizards
Source: MDPI journal article supplement (doi:10.3390/ani13132180), 2023-07-03
Supplement: s1 [file s1]

Table S2 The GBS results of *E. multiocellata*

| Sample        | Raw Base(bp)  | Clean Base(bp) | Error Rate(%) | GC Content(%) | Average depth (X) | Effective Rate(%) | Total-SNP |
|---------------|---------------|----------------|---------------|---------------|-------------------|-------------------|-----------|
| <b>Female</b> |               |                |               |               |                   |                   |           |
| Guo8735       | 1,231,840,224 | 1,231,840,224  | 0.04          | 43.77         | 4.68              | 100.00            | 5598458   |
| Guo9003       | 1,051,442,496 | 1,051,442,496  | 0.04          | 43.01         | 4.35              | 100.00            | 4724808   |
| Guo1696       | 2,377,806,195 | 2,377,720,371  | 0.03          | 43.73         | 7.01              | 100.00            | 12806942  |
| Guo4714       | 2,775,717,792 | 2,775,700,224  | 0.03          | 43.19         | 7.85              | 100.00            | 15563024  |
| Guo4900       | 2,413,617,984 | 2,413,604,448  | 0.03          | 42.92         | 7.71              | 100.00            | 13798978  |
| Guo822        | 1,778,529,312 | 1,778,524,704  | 0.03          | 43.86         | 6.40              | 100.00            | 9372400   |
| Guo893        | 1,861,386,515 | 1,861,380,755  | 0.03          | 44.05         | 5.98              | 100.00            | 9595964   |
| Guo1160       | 629,926,848   | 629,906,112    | 0.03          | 42.75         | 4.34              | 100.00            | 3473084   |
| Guo8471       | 1,993,541,184 | 1,993,489,920  | 0.03          | 44.31         | 6.65              | 100.00            | 10720500  |
| Guo1792       | 2,173,791,680 | 2,173,716,800  | 0.03          | 43.59         | 6.96              | 100.00            | 11827948  |
| <b>Male</b>   |               |                |               |               |                   |                   |           |
| Guo665        | 2,167,246,944 | 2,167,224,480  | 0.04          | 41.75         | 7.19              | 100.00            | 11898624  |
| Guo5353       | 1,901,571,264 | 1,901,489,472  | 0.03          | 43.03         | 6.91              | 100.00            | 10419004  |
| Guo2890       | 2,314,459,294 | 2,314,437,694  | 0.03          | 43.09         | 7.83              | 100.00            | 13147230  |
| Guo2472       | 2,121,109,799 | 2,121,087,911  | 0.03          | 43.30         | 7.23              | 100.00            | 11831540  |
| Guo2945       | 1,435,448,448 | 1,435,259,808  | 0.04          | 42.77         | 5.89              | 99.99             | 6541598   |
| Guo847        | 1,484,464,608 | 1,484,420,256  | 0.03          | 44.28         | 5.35              | 100.00            | 7375550   |
| Guo8963       | 1,124,268,480 | 1,124,229,024  | 0.04          | 43.63         | 4.25              | 100.00            | 5220292   |

| Sample      | Raw Base(bp)  | Clean Base(bp) | Error Rate(%) | GC Content(%) | Average depth (X) | Effective Rate(%) | Total-SNP |
|-------------|---------------|----------------|---------------|---------------|-------------------|-------------------|-----------|
| <b>Male</b> |               |                |               |               |                   |                   |           |
| Guo4885     | 2,410,947,360 | 2,410,883,424  | 0.03          | 43.13         | 7.35              | 100.00            | 13426584  |
| Guo8390     | 1,981,593,504 | 1,981,548,000  | 0.04          | 44.56         | 7.11              | 100.00            | 10482638  |
| Guo9077     | 1,232,690,400 | 1,232,658,432  | 0.04          | 43.42         | 4.98              | 100.00            | 5935992   |

Note: Raw Base: Initial data; Clean bases: the amount of effective data after filtering; Error rate: the average error rate of bases; GC content: the proportion of bases G and C; Average depth: average Sequencing depth; Effective Rate: Average effective rate of base; Total- SNP: total number of SNPs
