# Supplementary material for: Sex-Linked Loci on the W Chromosome in the Multi-Ocellated Racerunner (Eremias multiocellata) Confirm Genetic Sex-Determination Stability in Lacertid Lizards
Source: MDPI journal article supplement (doi:10.3390/ani13132180), 2023-07-03
Supplement: s1 [file s1]

**Table S1.** Specimen information and location data

| Sample No. | Species                      | sex    | Geographical origin                                           | Latitude | Longitude |
|------------|------------------------------|--------|---------------------------------------------------------------|----------|-----------|
| Guo1160    | <i>Eremias multiocellata</i> | female | Bayan Nur, Inner Mongolia                                     | 41.1N    | 107.87E   |
| Guo1696    | <i>Eremias multiocellata</i> | female | Yulin, Shanxi                                                 | 38.39N   | 19.73E    |
| Guo1792    | <i>Eremias multiocellata</i> | female | Lanzhou, Gansu                                                | 36.1N    | 103.79E   |
| Guo4714    | <i>Eremias multiocellata</i> | female | Yulin, Shanxi                                                 | 38.67N   | 109.65E   |
| Guo4900    | <i>Eremias multiocellata</i> | female | Yulin, Shanxi                                                 | 38.83N   | 101.01E   |
| Guo5052    | <i>Eremias multiocellata</i> | female | Gonghe County, Qinghai                                        | 36.33N   | 99.71E    |
| Guo5072    | <i>Eremias multiocellata</i> | female | Haixi Mongolian and Tibetan<br>Autonomous Prefecture, Qinghai | 37.46N   | 95.63E    |
| Guo5623    | <i>Eremias multiocellata</i> | female | Dulan County, Qinghai                                         | 36.02N   | 97.75E    |
| Guo822     | <i>Eremias multiocellata</i> | female | Ordos, Inner Mongolia                                         | 39.37N   | 109.72E   |
| Guo8471    | <i>Eremias multiocellata</i> | female | Bayan Nur, Inner Mongolia                                     | 40.42N   | 106.99E   |
| Guo8735    | <i>Eremias multiocellata</i> | female | Wuwei, Gansu                                                  | 37.31N   | 103.161E  |
| Guo8744    | <i>Eremias multiocellata</i> | female | Wuzhong, Ningxia                                              | 37.96N   | 107.1E    |
| Guo893     | <i>Eremias multiocellata</i> | female | Wuzhong, Ningxia                                              | 38.89N   | 107.71E   |
| Guo9003    | <i>Eremias multiocellata</i> | female | Wuzhong, Ningxia                                              | 38.66N   | 105.61E   |
| Guo4964    | <i>Eremias multiocellata</i> | female | Kazak Autonomous County of Aksay,<br>Gansu                    | 39.42N   | 94.28E    |
| Guo6940    | <i>Eremias multiocellata</i> | female | Bayingol Mongolian Autonomous<br>Prefecture, Xinjiang         | 42.44N   | 86.24E    |
| Guo6965    | <i>Eremias multiocellata</i> | female | Bayingol Mongolian Autonomous<br>Prefecture, Xinjiang         | 42.77N   | 86.32E    |
| Guo2472    | <i>Eremias multiocellata</i> | male   | Lanzhou, Gansu                                                | 36.04N   | 103.94E   |
| Guo2890    | <i>Eremias multiocellata</i> | male   | Wuwei, Gansu                                                  | 38.62N   | 103.14E   |
| Guo2945    | <i>Eremias multiocellata</i> | male   | Wuwei, Gansu                                                  | 37.91N   | 102.93E   |

| Sample No. | Species                      | sex  | Geographical origin                                           | Latitude | Longitude |
|------------|------------------------------|------|---------------------------------------------------------------|----------|-----------|
| Guo4712    | <i>Eremias multiocellata</i> | male | Yulin, Shanxi                                                 | 38.67N   | 109.65E   |
| Guo4885    | <i>Eremias multiocellata</i> | male | Lanzhou, Gansu                                                | 36.49N   | 103.4E    |
| Guo5006    | <i>Eremias multiocellata</i> | male | Geermu, Qinghai                                               | 37.61N   | 95.37E    |
| Guo5064    | <i>Eremias multiocellata</i> | male | Gonghe County, Qinghai                                        | 36.27N   | 100.35E   |
| Guo5353    | <i>Eremias multiocellata</i> | male | Xining, Qinghai                                               | 36.53N   | 102.02E   |
| Guo5365    | <i>Eremias multiocellata</i> | male | Dulan County, Qinghai                                         | 36.39N   | 98.09E    |
| Guo5420    | <i>Eremias multiocellata</i> | male | Dulan County, Qinghai                                         | 36.02N   | 97.94E    |
| Guo665     | <i>Eremias multiocellata</i> | male | Yuzhong County, Gansu                                         | 35.97N   | 104.17E   |
| Guo8390    | <i>Eremias multiocellata</i> | male | Yinchuan, Ningxia                                             | 38.43N   | 106.56E   |
| Guo8446    | <i>Eremias multiocellata</i> | male | Bayan Nur, Inner Mongolia                                     | 41.49N   | 106.92E   |
| Guo847     | <i>Eremias multiocellata</i> | male | Wushen County, Inner Mongolia                                 | 38.46N   | 108.75E   |
| Guo8671    | <i>Eremias multiocellata</i> | male | Linze County, Gansu                                           | 39.26N   | 100.1E    |
| Guo8935    | <i>Eremias multiocellata</i> | male | Zhongwei, Ningxia                                             | 37.44N   | 104.53E   |
| Guo8963    | <i>Eremias multiocellata</i> | male | Wuzhong, Ningxia                                              | 37.52N   | 107.07E   |
| Guo9077    | <i>Eremias multiocellata</i> | male | Alxa Left Banner, Inner Mongolia                              | 40.17N   | 104.72E   |
| Guo1061    | <i>Eremias multiocellata</i> | male | Alxa League, Inner Mongolia                                   | 40.01N   | 103.03E   |
| Guo1189    | <i>Eremias multiocellata</i> | male | Urad Front Banner, Inner Mongolia                             | 41.33N   | 108.51E   |
| Guo1208    | <i>Eremias multiocellata</i> | male | Dalad Banner, Inner Mongolia                                  | 40.21N   | 110.01E   |
| Guo1218    | <i>Eremias multiocellata</i> | male | Xilingol League, Inner Mongolia                               | 42.65N   | 115.57E   |
| Guo1836    | <i>Eremias multiocellata</i> | male | Kangping County, Liaoning                                     | 42.83N   | 123.17E   |
| Guo4960    | <i>Eremias multiocellata</i> | male | Linze County, Gansu                                           | 39.26N   | 100.09E   |
| Guo4965    | <i>Eremias multiocellata</i> | male | Kazak Autonomous County of Aksay,<br>Gansu                    | 39.42N   | 94.28E    |
| Guo5092    | <i>Eremias multiocellata</i> | male | Haixi Mongolian and Tibetan<br>Autonomous Prefecture, Qinghai | 37.98N   | 95.068E   |

| Sample No. | Species                      | sex    | Geographical origin                                | Latitude | Longitude |
|------------|------------------------------|--------|----------------------------------------------------|----------|-----------|
| Guo6936    | <i>Eremias multiocellata</i> | male   | Bayingol Mongolian Autonomous Prefecture, Xinjiang | 42.44N   | 86.24E    |
| Guo6957    | <i>Eremias multiocellata</i> | male   | Bayingol Mongolian Autonomous Prefecture, Xinjiang | 42.77N   | 86.32E    |
| Guo824     | <i>Eremias multiocellata</i> | male   | Ejin Horo Banner, Inner Mongolia                   | 39.37N   | 109.72E   |
| Guo860     | <i>Eremias multiocellata</i> | male   | Wushen County, Inner Mongolia                      | 38.18N   | 107.69E   |
| Guo926     | <i>Eremias multiocellata</i> | male   | Ordos, Inner Mongolia                              | 40.08N   | 107.73E   |
| Guo1774    | <i>Eremias argus</i>         | male   | Chifeng, Inner Mongolia                            | 42.89N   | 120.34E   |
| Guo1775    | <i>Eremias argus</i>         | male   | Chifeng, Inner Mongolia                            | 42.89N   | 120.34E   |
| Guo1783    | <i>Eremias argus</i>         | male   | Chifeng, Inner Mongolia                            | 42.89N   | 120.34E   |
| Guo1784    | <i>Eremias argus</i>         | male   | Chifeng, Inner Mongolia                            | 42.89N   | 120.34E   |
| Guo1791    | <i>Eremias argus</i>         | male   | Chifeng, Inner Mongolia                            | 42.89N   | 120.34E   |
| Guo1788    | <i>Eremias argus</i>         | female | xilin hot, Inner Mongolia                          | 44.20N   | 115.92E   |
| Guo1803    | <i>Eremias argus</i>         | female | xilin hot, Inner Mongolia                          | 44.20N   | 115.92E   |
| Guo1804    | <i>Eremias argus</i>         | female | xilin hot, Inner Mongolia                          | 44.20N   | 115.92E   |
| Guo1805    | <i>Eremias argus</i>         | female | xilin hot, Inner Mongolia                          | 44.20N   | 115.92E   |
| Guo1807    | <i>Eremias argus</i>         | female | xilin hot, Inner Mongolia                          | 44.20N   | 115.92E   |

Note: we selected 20 samples for analysis (♀: Guo1160, Guo1696, Guo1792, Guo4714, Guo4900, Guo822, Guo9003, Guo8735, Guo822, Guo8471; ♂: Guo2472, Guo2890, Guo4885, Guo665, Guo5353, Guo847, Guo8963, Guo9077, Guo8390, Guo2945). we selected 34 samples for PCR verification (♀: Guo8744, Guo5623, Guo5052, Guo5072, Guo822, Guo8735, Guo1792, Guo1696, Guo1160, Guo893, Guo9003, Guo1788, Guo1803, Guo1804, Guo1805, Guo1807; ♂: Guo4712, Guo5365, Guo5006, Guo5420, Guo8446, Guo8935, Guo8671, Guo5064, Guo9077, Guo5353, Guo8963, Guo8390, Guo4885, Guo1774, Guo1775, Guo1783, Guo1784, Guo1791).
