# Supplementary material for: Sex-Linked Loci on the W Chromosome in the Multi-Ocellated Racerunner (Eremias multiocellata) Confirm Genetic Sex-Determination Stability in Lacertid Lizards
Source: MDPI journal article supplement (doi:10.3390/ani13132180), 2023-07-03
Supplement: s1 [file s1]

Table S5 The sex-linked loci of *Eremias multiocellata* and 15 (Z chromosome of *Eremias argus* ) comparison results

| Query id       | Subject id | Identical(%) | s.start  | s.end    | e-value   |
|----------------|------------|--------------|----------|----------|-----------|
| CLocus_2509101 | 15         | 93.662       | 343298   | 343157   | 2.38E-53  |
| CLocus_2613373 | 15         | 91.275       | 9768584  | 9768289  | 1.31E-115 |
| CLocus_2619237 | 15         | 94.253       | 15646953 | 15647036 | 2.48E-28  |
| CLocus_2623385 | 15         | 83.186       | 28365947 | 28365835 | 1.5E-20   |
| CLocus_2627643 | 15         | 84.681       | 31510020 | 31510242 | 1.44E-55  |
| CLocus_2630176 | 15         | 95.683       | 24802862 | 24802724 | 1.1E-56   |
| CLocus_2632474 | 15         | 83.663       | 23336827 | 23336626 | 4.37E-51  |
| CLocus_2634103 | 15         | 96.694       | 42671775 | 42671895 | 5.17E-50  |
| CLocus_2638060 | 15         | 94.253       | 15647036 | 15646953 | 2.5E-28   |
| CLocus_2644282 | 15         | 100          | 15571344 | 15571379 | 1.98E-09  |
| CLocus_2651210 | 15         | 88.525       | 27525803 | 27525682 | 6.84E-34  |
| CLocus_2652133 | 15         | 80.645       | 14607135 | 14606827 | 8.48E-63  |
| CLocus_2652720 | 15         | 96.694       | 42671895 | 42671775 | 5.17E-50  |
| CLocus_2652720 | 15         | 96.694       | 42671895 | 42671775 | 5.17E-50  |
| CLocus_2657105 | 15         | 79.851       | 45901784 | 45901652 | 1.96E-14  |
| CLocus_2657292 | 15         | 92.593       | 34282597 | 34282650 | 3.27E-12  |
| CLocus_2693823 | 15         | 80.645       | 14606827 | 14607135 | 8.48E-63  |
| CLocus_2706132 | 15         | 83.088       | 40940839 | 40940965 | 7.37E-24  |
| CLocus_2785097 | 15         | 94.444       | 35605996 | 35605853 | 3.97E-56  |
| CLocus_2811212 | 15         | 93.269       | 38886696 | 38886593 | 1.49E-35  |
| CLocus_2847708 | 15         | 83.186       | 28365835 | 28365947 | 1.5E-20   |
| CLocus_2876301 | 15         | 88.971       | 1438265  | 1438133  | 6.79E-39  |
| CLocus_2876954 | 15         | 89.404       | 4177114  | 4176813  | 7.95E-108 |
