# Supplementary material for: Sex-Linked Loci on the W Chromosome in the Multi-Ocellated Racerunner (Eremias multiocellata) Confirm Genetic Sex-Determination Stability in Lacertid Lizards
Source: MDPI journal article supplement (doi:10.3390/ani13132180), 2023-07-03
Supplement: s1 [file s1]

Table S6 The sex-linked loci of *Eremias multiocellata* and NC\_046330.1 (W chromosome of *Lacerta. agilis*) comparison results

| Query id       | Subject id  | Identical(%) | s.start | s.end   | e-value  |
|----------------|-------------|--------------|---------|---------|----------|
| CLocus_2847708 | NC_046330.1 | 91.597       | 274596  | 274729  | 6.12E-41 |
| CLocus_2623385 | NC_046330.1 | 91.597       | 274932  | 274814  | 6.12E-41 |
| CLocus_2648560 | NC_046330.1 | 85.211       | 286461  | 286320  | 6.16E-36 |
| CLocus_2811212 | NC_046330.1 | 90.099       | 1762593 | 1762493 | 1.74E-31 |
| CLocus_2642652 | NC_046330.1 | 93.750       | 1786883 | 1787025 | 1.69E-56 |
| CLocus_2656459 | NC_046330.1 | 93.750       | 1787025 | 1786883 | 1.69E-56 |
| CLocus_2629307 | NC_046330.1 | 97.203       | 1794423 | 1794565 | 7.64E-65 |
| CLocus_2709754 | NC_046330.1 | 97.203       | 1794565 | 1794423 | 7.64E-65 |
| CLocus_2651210 | NC_046330.1 | 95.890       | 2332431 | 2332318 | 1.03E-33 |
| CLocus_2657105 | NC_046330.1 | 91.489       | 3942855 | 3943003 | 7.80E-50 |
