# Supplementary material for: Sex-Linked Loci on the W Chromosome in the Multi-Ocellated Racerunner (Eremias multiocellata) Confirm Genetic Sex-Determination Stability in Lacertid Lizards
Source: MDPI journal article supplement (doi:10.3390/ani13132180), 2023-07-03
Supplement: s1 [file s1]

Table S4 The identified sex-linked loci information of *E. multiocellata*

| Locus   | Seq                                                                                                                                                                                                                                                                                                                                                                          |
|---------|------------------------------------------------------------------------------------------------------------------------------------------------------------------------------------------------------------------------------------------------------------------------------------------------------------------------------------------------------------------------------|
| 1821010 | TAAC TTTTTTTTTTTTTTGGGGGGGGGGGGAGGGAGGCAATCAAATGAAATCCCACAAGCTGTCATTCAGCAAACACTGACAACTACTATATTA<br>TGGTATGTATAGGAAGGCTGGGGAACTTATGGCCTTTTGGTTACTGTTGGATTCCAATNNNNNNNNNNNGTCAGGGATGATGGGAGTTGAGG<br>GGTTGCAAGAAGGCAGCAATTCCCATTTCCACCTGCATTCAATGCAATCAGTGCTGTTTCCATTCTGCTGCAGTTTGGGTTCTGCCAAACAC<br>TATGTTATTTGTCTCATTGTCTGTGAATTA                                            |
| 2280877 | TAAC TCCGAGCCAGTTGGAGTCAGTTGGGAACAACGTCAAGGGGTGACCGTTAGAAATTTGAATTGGAGGGAGGAGTATAAAAAGGGAG<br>AAGTACCAGTGTGAAAGAGTTAGAGTTCTGGGAGAGAGTGTGTGGGTGGTAATTGNNNNNNNNNNNTTTTGGTCTTGGGTGAGGCTGGCTA<br>GGTTGGGAGATAGGAGAGTGATAGGCTTTACTGTTTTAGTTCCTACTTTATCTTAGTCCCTTTATGATCCAACCCTATTCATTTCATTCCCCTA<br>TCTGTTATCTTTTTATTATTCTTA                                                      |
| 2605241 | TAAGATCAGAATACAGTGTA AAAATTTGACCCTTTGGTCCACATACTGTATGTTGCCAATGTTCCACCTGCATATTATAACCTTTTTTTCTTCTTT<br>TTTGCCCATTTTCATCATA CATGGTTTTGCTTCTTCTTGAATTTCAAGATTNNNNNNNNNNNATTTCAACAAATGCCGAGACACTGGAACCTCCAG<br>TAATGAACTCAATCCGTTCCAGGGGGGCTACCCACCTAGAAGCAGGCGTATTTCAAGCCTAGTACAAAACATTGCTTGGTCTCCGTTTTCC<br>TCCCTAACAAAAATGTAAAAAAGCTAAGAAATACAAATATGTACATATATTGATGCAGAAGATTTTA |
| 2610570 | TAATTATATTGTAAACCTCATCCCAGAATGGTCTTATTTTTATGCACGTCCACCACATGTGCCATACTGTCCCTACATCCAACCTTGCACCTCCA<br>ACAGACATTACTACATCCTTTATACATTTTTGCCAATTTGTGTGGTACCANNNNNNNNNNNCCATTTTATATACATTTTCTTTTAGATCATAGTTG<br>GGTGTA AACTTCAGTCCTTTATTCATAAAGTCTGCCACTCTTCTAACATAATTTTTTGCCCATATCCTGGGCCCACCTGATCATTGCCTCTTT<br>TACATACTCGTCTTTAGTTTTCCCATTTCTAAAAGGTGGTTATATATTTTTTTA              |
| 2619237 | TAATGTATGCTGCAATAAATCATTTTTGATAAAAGCAAGCTGGCTGCAAAGTGCGGTTCTTGCAAGAGACACCCTCTAATTGACTCATAACAAC<br>GGATAACGACAGAACTTATGAGTTTATTTTGGCTCTCTTTCAATGGCTGGNNNNNNNNNNNATAAGAGTCTTTGGTGAGGTAACTATGATTT<br>GTTGGACATAAGCTACCTGATAAAGA AACTGCAACATTTGGGAAAGTGGGGAATCTGAGAGTCTTTTCTTTCTTCTCTCCATGCCGACTCCA<br>TCAATCACAAATCACAAATTA                                                     |
| 2623385 | TAAGAAAGCAGGAAGGGGAGTGGCTATACTATTGCTCAAACGTCCAAGACAGAGCAGTAGTCTGCAGAGGTAGATTGCCTTGGAGCTAGT<br>TAGTGTGGAATGGTGTGCATATCCTTGCACCTTAGGAGCTGATGTAATGGAGTNNNNNNNNNNNGGATAGGGAGCCCAGCTTTGTGGTTGTTC<br>CAGTCC TACTTGGATGGTCATTTCCAGAGGGTGATGATTGGGGAGAGCTGTGAAGCCCTGTGAAGCCTTCAATGTGGGGTTCCTCAGGGTTT<br>GATTTTATCCCCCATGCTGTTTA                                                      |

|         |                                                                                                                                                                                                                                                                                                                                                   |
|---------|---------------------------------------------------------------------------------------------------------------------------------------------------------------------------------------------------------------------------------------------------------------------------------------------------------------------------------------------------|
| 2627643 | TAATTGGAAAATGTGCATTCTCAAAAGTACAATTGACTCTGACGTCCCAATGTAGCAATATACACAGAGGAGAGTATTTTCAGTGCCTCATCT<br>GAAAAAGTTGCTTTAGGATATAACAATTACTGCATTAGCCCTTTATGCCAGAATACTGCAAGTCATATTTATTTGATCCCCAAACATTGCGCTT<br>CTTATTCTTGATTGTCCTATGCCTGTGAAATATATTGTTAGCACTTGTTGAACGTTTGGTCCTATTTTTATTACTGTCTAGAGAAGCTGATCAG<br>GCTGTTTTGCTAGCTGTTA                          |
| 2628103 | TAACTTGCCTGCTTCTTACTTGAAGAGCCTCTTCTTCCACTTCCAACCTGTTCTGTCCCCACCTTCTTCTCTGACTGCTCAGACTCTTCCCC<br>TTCCCTTTGCCCTGGCTCCTGTTTCACAGGTGGCAACAAATAGCCATAAATNNNNNNNNNNAGCTTCTCCTCCCCCCCATCTCCATCACACA<br>CTCGACAGAGCCCTACCTGTCCCAGACATTTCTGTACTTTACCAGGTTTCTGTAAAACCTGACTCAGTTTCCTATGCATCAAGAAAGTAATTT<br>TCCCAAATACCAGGTTTTTA                             |
| 2629184 | TAAGCCCCCAAAGCGGGAGAATCCCGCAAAAAATGGGAGGGTTGACAGGCATGCTGGGGAGAGTCCAGAAGGCCAGATAGATGTGATGC<br>TCATGGAGCTATACAGAACCCAAATCCTAATAATTAGCAGAAGAGATACATCANNNNNNNNNNCAGATGTCTTGTAAGTTGAGGAGATGC<br>ATGTTTATGAAGGGGGGAGAGAGAAAGTCTGCCCCCAATCAGCCCACTTTTGCTCGTCCTGCCCACTGCCAGTATGTGTGTCTCCCAATAA<br>CCTTCCCCACAGAAATGAACCCTTAACCCCCAAAATGTTCCCCACCCTTGGCTTA |
| 2629307 | TAAAACTTTTGAGCTACTGTGGATGACTGTCCATCACTACCCACAGCTTGTTGTTGCTTCTTAGCTGCCTCCCATCACAGTTCTTCCACATT<br>TCTGTAGTGGCAACCTTGCCCCCATCCTAGTTGTGCATAGTCCCTAATGATANNNNNNNNNNGGGATTGGTGGCAGGTGACCCTGTTGCTCAT<br>TCAAGGGCATAACAGTCCTGGCAAAGTCCATATTGGCATGTCGCTGTTGAATTTAGGCTGGTCCAGCATTATTGTGAGACCTCCCCTGCCCTTT<br>TGTCTGCTGTAATCTTTTA                            |
| 2630176 | TAAGCTTCTGGGCGGGGAACAGACAATCGGTACTTCGAGGTTCTGATTCTGACTAAGCATGTCGTACTTTCTGCTTTGCTGTACATAATGCAA<br>TAAAGTTAGTTAGTACTACCAGTTGGCTGGTTTATGTCTGCGGACGCTGATNNNNNNNNNNNACAATCACCGCACCAGATATTCTCTTTTGC<br>CCTCCTAGACTGTACTCTAAAACATTTTTCCATTCTTGTTCATCTCTGCTCCTTCTATTTCCAACCATAGAGCCAGTTCTTCAACCACTCTTT<br>TCCTTTTTTTCTTTATTA                              |
| 2632474 | TAACAAATAAGGGACTGTGGCAGGAAAGGGGGCCAAAATAAGGGAAATCCCTGGAAATAAGGGATACTTGACAGCTATGGCGATGGGGTG<br>AGCTCCCCTTGCTCAGTCCCAGCTCCTGTCAACCTAACAGTTCAAAGCACCTTTNNNNNNNNNNNAATAGGTTCCGCTCCAGCAGGAAGGTA<br>ACAGCGTTTCCGTGCACTCTGGTGTCGGTGTTCTGTGCATGCCAGAAGCAGTAGTCATGTTGGCCACATGACATGGAAAACTGTTTGAGGA<br>CAAATGCTGGTTTGGCACTGGACTTAACTGTCAGGGGTCCTTTACCTTTTA  |
| 2634103 | TAATAGAGATATATAATAATCAGAAGAAACATACAAGTGGAGTCATGATGCCAGTCTGAGGATTGTGGTCCTGAACACAATGGCCAGGCTC<br>AACAGCATGTATGAATTCTGATCATAAATCCCACATGATTCCTACAATGCAGNNNNNNNNNNGCCATGGATATTGTTAGGGACAAGTCAGAC                                                                                                                                                       |

|         |                                                                                                                                                                                                                                                                                                                            |
|---------|----------------------------------------------------------------------------------------------------------------------------------------------------------------------------------------------------------------------------------------------------------------------------------------------------------------------------|
|         | GCGACGTCGGTAGAAAGCAAGAAAGTAAAGTGGCTGTCCAGTGAGGCCTTACAAATCGCGGGGGAGAGAAGGCAAGCAGAATGCAAAGGAGATAGTGTAGGATACAGGAAATTA                                                                                                                                                                                                         |
| 2638060 | TAATTTGTGATTTGTGATTGATGGAGTCGGCATGGAGAGAAGAAAGAAAAGACTCTCAGATTCCCCACTTTCCCAAATGTTGCAGTTCTTTTATCAGGTAGCTTATGTCCAACAAATCATAGTTACCTCACCAAAGACTCTTATNNNNNNNNNNNNNCCAGCCATTGAAAGAGAGCCAAAATAAACTCATAAGTTTCTGTCGTTATCCGTTGTTATGAGTCAATTAGAGGGTGTCTCTGCAAGAACCGCACTTTGCAGCCAGCTTGCTTTTATCAA<br>AAATGATTTATTGCAGCATACATTA          |
| 2642652 | TAAGTCACACAGAGCCCTCTGTAACGCCTCTGGGGTCCCATGCTCCTTTTATTTTATTTTATTTTGAAGGAGGATGTGGGAGGCTGTTTTT<br>AGTTTGGTGGTTCATTCTGTCTCTTTCCATCCCTCCCTGTAGCGGGGTTATGAGCTNNNNNNNNNNNCCCTCAGATAAATTCCTTGTTTTTATAT<br>CCCTCATTGTTGGGCGCAAGGGTCCCCCTCCCCGTTTCAGTCCACAGTTGCAGGAAAGGGGCCCATAGCTCATTGTCAAAGCATATAGAGGT<br>GGCACCTGCCATTTCAAAGTGTTA |
| 2644282 | TAAGGGATATCGTGTAGGGCAAGAAAGCAATGGCAGCTACAGTAGTTTTATTAGAGGTAAATGTGTAATGGACTGTAGCTGATAGAGGACTT<br>TTTATTTTTGTGATGAGAAGCAAATGGTGAGCCACTGTGTGAGACAGAATGGNNNNNNNNNNNCTGCACAGCAATGCCACTATTTTCAAGTG<br>TAGTAATTTGGTATGAGATCCAAAGTGGCACGGAATGTGTAAATTTAGAGAAGAAAAATGTATGAGACTGTGGTAAAAGGAAAGTCAGAGA<br>AATGGTTTAGTTGGGATTTTTTTTA   |
| 2645069 | TAAAGCATCTTCTTCCCTCTCTCTTTATTTATAATTGCCTATTTGAACATACAAAAGTGCCTTATATTTAGTCAGAAGATTGATCTATCTAGATC<br>TGTGCTGACTGGCAGCAGCTTTTCTGGGCTTCAGGCAGCAGACATTCCNNNNNNNNNNNGGACCTTCTGCATGCAAAATGCAACAGCCAAT<br>CCAGATCCCACAGAGTTACCCACAGATTGAAGCCAGGGCTCCTACCTTCAGAGGCTCTACTGTTAGAAAGTTTGGTTAGATGGAAGACAGA<br>AAAATACAAAGGATTTTTTTTA    |
| 2647001 | TAAAAAAATCCTTTGTATTTTCTGTCTTCCATCTAACCAACTTTCTAACAGTAGAGCCTCTGAAGGTAGGAGCCCTGGCTTCAATCTGTGG<br>GTAACCTCTGTGGGATCTGGATTGGCTGTTGCATTTTGCATGCAGAAGGTCCNNNNNNNNNNNGGAATGTCTGCTGCCTGAAGCCCAGAAAAG<br>CTGCTGCCAGTCAGCACAGATCTAGATAGATCAATCTTCTGACTAAATATAAGGCAGTTTTGTATGTTCAAATAGGCAATTATAAATAAAGAA<br>GAGAGGGAAGAAGATGCTTTA     |
| 2647600 | TAAAAACCTGGTATTTGGGAAAATTACTTTCTTGATGCATAGGAACTGAGTCAGTTTTACAGAAACCTGGTAAAGTACAGGAAATGTCTGG<br>GACAGGTAGGGCTCTGTGAGTGTGTGATGGAGATGGGGGGGAGGAGAAGCTNNNNNNNNNNNATTTATGGCTATTTGTTGCCACCTGTGA<br>AACAGGAGCCAGGGCAAAGGGAAGGGGAAGAGTCTGAGCAGTCAGAGAAGAAGGTGGGGGACAGAACAGGTTGGAAGTGGAAGAAGA<br>GGCTCTTCAAGTAAGAAGCAGGCAAGTTA      |

|         |                                                                                                                                                                                                                                                                                                                         |
|---------|-------------------------------------------------------------------------------------------------------------------------------------------------------------------------------------------------------------------------------------------------------------------------------------------------------------------------|
| 2648560 | TAAC TTCTGGGTTGTCGGCATACAAAACCCGAAACATTTGACTTCTGACGCATTACCAAATGAGGTTCCACTGTATTCCAAATGGAGGGAA<br>ATAAACAATGCCAGCTACATGGTTAGCATAGTTTCCCTCCAATTCTGGGGACNNNNNNNNNNAGCACATTATTGGAATGCCTCCTTCTTACC<br>ATCTCCAAAATCTCTGCTCTAACACTGCAAATCTTCATGCAGCCTCAAAGAAGAGGCATATAAGGTCTGGACCTTCTCTTATAGTCTTTTCAC<br>TTTCAATGATATATGGACTTA  |
| 2651210 | TAAAAGTAGCCCCATGTAGATTACATTGCAGTAGTCCAAGCGGGAGATAACCAGGGCATGATAGGGTCTCAGCCTGCATACAAGATGGAGCT<br>GGTAGACAGCTGCCCTGGACACAGAATTGACCTGACAGCTGTGAGTCCAAAANNNNNNNNNNGGGAGTCTCCACACCTGCCCACCCCT<br>TGAACAGTACCTCTGTCTTGCCAGGATTCAACCTCAATCTGTTATCTGCCATCCATCCTCCAACCTCTCCAGACACGCACACAGGACCTTC<br>ACTGCCCTCACTGGTTCTGATTTA     |
| 2651709 | TAACCAAAATAAAAAATAAGGGATATTGTGTAGGGCAAGAAAGCAATGGCAGCTCTAGTAGGTTTATTTGAGGTAAATGTGTAATGGACTGTA<br>GCTGATAGAGGACTTTTTATTTTAGTGATGATGGTGATGATAACTGCACAGNNNNNNNNNTGGCATGGAATGTTTAAATTTAGAGAAGAA<br>AAATGTATGAGACTGTGATAGAAGGAAAGTCAGAGAAATGGTTTGGTTGGGATTTTTTTTACTGTAATTGCCTTAGCGAGGTGTGGGCAGGG<br>GGGGGGGCTGGATCGATACCTTTA |
| 2652133 | TAACTGAGCTGTGTCATTCAGGGTGCACACAGGATTCATGGAGTTCTCATACACAACAAGGTCCTTCAGATCCTTCTTCTTGGAGGAATCT<br>CGGGCAGCCTCACCAACTTTCTGAACATGGACTGCTTTGGTGACCCAGCATNNNNNNNNNTTCAGTGCCTCGTCTGCTGCAGCATGCTT<br>GCTGGTTTTCTTTGTGCCATACCCTTCAGCTAAAAAGTGGTCCTGTAGATAGACACTGCAGTGCCACAAGCGGTTTGGCATCAGGACATATT<br>TGTATTCAATGGTCATTTTGTTA     |
| 2652720 | TAATTTCTGTATCCTACACTATCTCCTTTGCATTCTGCTTGCCCTCTCTCCCCGCGATTTGTAAGGCCTCACTGGACAGCCACTTTACTTTCT<br>TGCTTTCTACCGACGTCGCGTCTGACTTGTCCCTAACAATATCCATGGCNNNNNNNNNCTGCATTGTAGGAATCATGTGGGATTTATGATCA<br>GAATTCATACATGCTGTTGAGCCTGGCCATTGTGTTTCAAGGACCACAATCCTCAGACTGGGCATCATGACTCCACTTGTATGTTTCTTCTGATT<br>ATTATATATCTCTATTA   |
| 2656459 | TAACACTTTGAAATGGCAGGTGCCACCTCTATATGCTTTGACAATGAGCTATGGGCCCTTTCTTGCAACTGTGGACTGAAACGGGGGAGGG<br>GGAACCTTGCGCCCAAATGAGGGATATAAAAACAAGGAAATTTATCTGAGGNNNNNNNNNAGCTCATAACCCCGCTACAGGGAGGGAT<br>GGAAAGAGACAGAATGAACCACCAAATAAAAACAGCCTCCCACATCCTCTTTCAAAAATAAAAATAAAAAGGAGCATGGGACCCC<br>AGAGGCGTTACAGAGGGCTCTGTGTGACTTA     |
| 2657105 | TAAAGTATTTGGGTTTGATAGGGGATCTCATAGCTCTATGATAGTTGCTCATCAGAACTAAAGAACACTATAAAATGCTGTTCTGCCAAATA<br>CAGAGGTGGTTCTCAGAGGTATCAGGACAAATAAACCAAGCAGACAGAAGGNNNNNNNNNAAATCAGCATGTCCCAATCTACTCCCAG                                                                                                                                |

|         |                                                                                                                                                                                                                                                                                                                          |
|---------|--------------------------------------------------------------------------------------------------------------------------------------------------------------------------------------------------------------------------------------------------------------------------------------------------------------------------|
|         | GAGCCCCCTCAAATGGGTAGCGAGGACACACAAACCCACTCACAGCACCCCTAGCCCTGGGTCTGTGATGAGGCTCCCTCCCTCAAATGCCTG<br>CCTTTTATAGGGAACCTTGATCTTA                                                                                                                                                                                               |
| 2657292 | TAACCTGAAGCACCAGTTTAGCTAATGGGGCCTCCTGCTGCCGCTGTACCGCTATACTGCTGGCACGCTGTACTGCTGGCACACGGTTTCTG<br>TTCTCAACTTGAGGCAAAGAAGTACCTTGAGGTAAGTACTCCCATACATACNNNNNNNNNNNATGAAGACAAAGGAGACAGGGACTTGAA<br>CCAGCAAGCTCTGCCATTGGGGGAGGAAGTGCTGAGTCCTGTCTGCGCTGACAGTCCTCCCTCCGCTCTCCATGCAGGCACCTTTTATTGATC<br>ACCAGATCACCAGAACACTCATTAA |
| 2666913 | TAATTCTCTCAAATCCATTTCTGGACCTGCCATCGATCTGCGGCCAGAATTGAGGATGCACGCATGCAAACATGACAATTGTGTTCTGCAGCT<br>TCACATCTGCATCGTTCTCAACTGTTTCAACACAACAGGCTCTCGGTTGTGCATTCCACTATGACCCTGCTGTTGATTATAGCTCAAGCCATC<br>ATGTTCTCATCGGCACTATGACTGAAGTGTGTCATTACTGCAGAGCTCTAAAATTTCTTAAAGAACTCAAGGAATGTGTTGTGCCGCTGGA<br>AAAGTTA                 |
| 2657524 | TAAGGCATCGCAAAAAGTACAAGCGCTGCTGGGCCTTCTTCACTAGCGACTCAGTGCTCCACAACCAGACCAACCTGTTTGTAGTTGTAC<br>TCCCAGGATTTTATGCTAGCAAACATTTCCATTGGCAGGTTGTCAATAAATAGNNNNNNNNNNNATCGACAACGATCTCTCTGGTATTTCCACA<br>TTCAGCCCCAAGATTATTTCTCCTGCAGCAATTCCTAGACTCTTCTTCTCAGTACAGCCCCCATTTTCTTCTGAATCTGACCCACCA<br>GTTATATCATCTGCATATTTA         |
| 2692930 | TAAACCCTCCATTTGGGAATCCCTTGCAGATAACTGAAGTAGCTGAAGACAGTCAGGTCTTTTCTCCACACCAGTGACCAGAGGAGGAATG<br>ACCCCTGGGGGGAACACCAGAATGAAGAAATGCCATTATGCACCTGCAGGAGCNNNNNNNNNNNAAACATATCACTCCCATGTCAGTTTCTA<br>CAGCCGTAGTGGGCACTGCAACTCTCCAGTGGTTTGACTTTATCCCAATGGTGCACGCTTCCATTGTCTCTCGAGGCAAACGGATGCCAACA<br>AACCTTCACATACACATTCATTTA  |
| 2693823 | TAACAAAATGACCATTGAATACAAATATGTCCTGATGCCAAACCGCTTGTGGCACTGCAGTGTCTATCTACAGGACCACTTTTGTAGCTGAAG<br>GGTATGGCACAAAGAAAACCAGCAAGCATGCTGCAGCAGACGAGGCACTGAANNNNNNNNNNNATGCTGGGGTCACCAAAGCAGTCCATG<br>TTCAGAAAGTTGGTGAGGCTGCCCCGAGATTCCTCCAAGAAGAAGGATCTGAAGGACCTTGTTGTGTATGAGAACTCCATGAATCCTGTGTG<br>CACCTGAATGACACAGCTCAGTTTA |
| 2695650 | TAAGCGACTTTGCTAGCATAGATTGAGCTGGGACCCTGAGTTCCAGTGATGAACCTGTGAGATTCAAAGCTGCAAATTCTCTGGAAATCAAG<br>CTGGAGAACTCCCAGATTGCAAATGTGATGCATGGGAGGAGGGAATGAAATCTCCAGCAAGCCTCAGCTTTTTACGGAGACGCAGCTGTGT<br>ATGTTACCTCTGGGAGATAATGCGGGCAGTGGTCCAAGTCAAGGGCTGGGAAGAATTTCCCTTGCAAAAACCTGCGAGAACGACCAGAAA<br>CTTA                        |

|         |                                                                                                                                                                                                                                                                                                                                           |
|---------|-------------------------------------------------------------------------------------------------------------------------------------------------------------------------------------------------------------------------------------------------------------------------------------------------------------------------------------------|
| 2706132 | TAAGTCTCCTTCACCAGTATTGCCTTGTTGAAGCAGTTACCACAATATTATTTTCGATACCAGTATTCAATGATATGGCAGTTTATTACACAACC<br>CTACTAGCTGGGAACCTCTATTGTGTTCAGTACAGTCATACCTTAGTTGNNNNNNNNNNNGGCTCCCAAACGCCGCAAACACAGAAGTGAG<br>TGTTCCAGTTTGTGAATGTTTTTTGGAAGCCAAACATCTGGTGGGGCTTCTGCAGTTTTTTGATTGGGTGAAGGAAACTCCTGCAGCCAATCG<br>GAAGCCACACCTTGGAAGTTAATTGTGGAGACTACTTA |
| 2709754 | TAAAAGATTACAGCAGGACAAAAGGGCAGGGGAGGTCTCACAATAATGCTGGACCAGCCTAAATTCAACAGCGACATGCCAATATGGACTT<br>TGCCAGGACTGTATGCCCTTGAATGAGCAACAGGGTCACCTGCCACCAATCCNNNNNNNNNNNTATCATTAGGGACTATGACAACCTAGGAT<br>GGGGGCAAGGTTGCCACTACAGAAATGTGGAAGAAGTGTGATGGGAGGCAGCTAAGAAGCAACAACAAGCTGTGGGTAGTGATGGACAG<br>TCATCCACAGTAGCTCAAAAGTTTTTA                   |
| 2811108 | TAACTTAGTGTGAATGGAAGCAATTCTTCTGATGGCCTTGGAACCATCATTTGATGAACTACCATCAACTGTTGGAGCTGCTCTCATCAGAAGG<br>ATCACTGTACATATGTTCAATTAGTCCTAGATGTCTCATAACGTGTGATGCTNNNNNNNNNNNTCATCATAGGGTTGAAAGTGGTGAGATGTTTG<br>GATGCCAGTCAAATTGGTGACATTATTCCACCTTTTCATCAATAAATGGTGTGTTTGACTTCACTTTTTTTTTTTTTTTTTTTTGGAGTAACATACAA<br>GATGTGCTTCTGTCAACTTTA          |
| 2811212 | TAAACTTTTTATGTCCAACATCCTTTGCCCAATCTATCATAACAGATTTTACTTGTTTCATCTTTCATATGCCACTCCAGCAATAAATTATACATTT<br>TGGAATATTCTTAGTCTTGGAACGCTTGGAACCTCTCACCTCGCTGGGCTNNNNNNNNNNNAGAAGGATGGGGGGAAGGGAGGAGGTTGA<br>TGGTGTCTCTACCGCCATGCCCCACATCAATGCAGCTGAATGCGGCTGGGAAGGGGAGCGCAGGGCGGGAAGGGGGAACATGGAGGTGG<br>CACAAGCAGATTGCTGACCCCTTA                  |
| 2847708 | TAAACAGCATGGGGGATAAAATCAAACCTGAGGAACCCACATTGAAGGCTTCACAGGGCTTCACAGCTCTCCCCAATCATCACCTCTG<br>GAAATGACCATCCAAGTAGGACTGGAACAACCACAAAGCTGGGCTCCCTATCCNNNNNNNNNNNACTCCATTACATCAGCTCCTAAGGTGCA<br>AGGATATGCACACCATTCACACTAACTAGCTCCAAGGCAATCTACCTCTGCAGACTACTGCTCTGTCTTGACAGTTTGAGCAATAGTATAG<br>CCTCTCCCTTCCTGCTTTCTTA                         |
| 2876301 | TAAGCCCTGTATACCTGATGGAGTGTGTCTTCCCCATCATTCAGCCTGGACACTGAGGTCCAGCGCTGTCAGGGGTTACCCCCAGAGTAGC<br>AGAGTGATCAGTGAGGCTGAGCAGGAGGACAAGATAGAGGAAGAGGAGTGGGNNNNNNNNNNGGGGGCTCTTGAGGCTCAGAGAGTC<br>CCTGCATTGCCCAGGGAGAGAGAGGTGCCAGACCAGGGGGAGAGAGGGCGCCCTTTAGCAGTTCTGGAAGTGAAGGGGAGATCGTTCC<br>CCCTTACCCCCAAGAGCGTAGGGAAGTTA                       |
